# Supplementary material for: Collaborative research methods and best practice with children and young people: protocol for a mixed-method review of the health and social sciences literature
Source: PubMed Central journal article supplement — BMJ Open. 2022 Oct 6;12(10):e061659. doi: 10.1136/bmjopen-2022-061659 (PMC9540839; doi:10.1136/bmjopen-2022-061659), 2022-10-06
Supplement: bmjopen-2022-061659.draft_revisions.pdf [file bmjopen-2022-061659.draft_revisions.pdf]

# BMJ Open

BMJ Open is committed to open peer review. As part of this commitment we make the peer review history of every article we publish publicly available.

When an article is published we post the peer reviewers' comments and the authors' responses online. We also post the versions of the paper that were used during peer review. These are the versions that the peer review comments apply to.

The versions of the paper that follow are the versions that were submitted during the peer review process. They are not the versions of record or the final published versions. They should not be cited or distributed as the published version of this manuscript.

BMJ Open is an open access journal and the full, final, typeset and author-corrected version of record of the manuscript is available on our site with no access controls, subscription charges or pay-per-view fees (<http://bmjopen.bmj.com>).

If you have any questions on BMJ Open's open peer review process please email [info.bmjopen@bmj.com](mailto:info.bmjopen@bmj.com)

# BMJ Open

## Collaborative research methods and best practice with children and young people: Protocol for a mixed-method review of the health and social sciences literature

|                               |                                                                                                                                                                                                                                                                                                                                                                                                                                                                                                                                                                                                                              |
|-------------------------------|------------------------------------------------------------------------------------------------------------------------------------------------------------------------------------------------------------------------------------------------------------------------------------------------------------------------------------------------------------------------------------------------------------------------------------------------------------------------------------------------------------------------------------------------------------------------------------------------------------------------------|
| Journal:                      | <i>BMJ Open</i>                                                                                                                                                                                                                                                                                                                                                                                                                                                                                                                                                                                                              |
| Manuscript ID                 | bmjopen-2022-061659                                                                                                                                                                                                                                                                                                                                                                                                                                                                                                                                                                                                          |
| Article Type:                 | Protocol                                                                                                                                                                                                                                                                                                                                                                                                                                                                                                                                                                                                                     |
| Date Submitted by the Author: | 09-Feb-2022                                                                                                                                                                                                                                                                                                                                                                                                                                                                                                                                                                                                                  |
| Complete List of Authors:     | Nowland, Rebecca; University of Central Lancashire, School of Community Health and Midwifery<br>Robertson, Laura; Poverty Alliance<br>Farrelly, Nicola; University of Central Lancashire, School of Social Work<br>Roy, Alastair; University of Central Lancashire, School of Social Work<br>Sharpe, Darren; University of East London, Institute for health and Human Development<br>Harris, Cath; University of Central Lancashire, Applied Health Research Hub<br>Morocza, Nora; University of East London, Institute for Connected Communities<br>Larkins, Cath; University of Central Lancashire, School of Social Work |
| Keywords:                     | Community child health < PAEDIATRICS, Child & adolescent psychiatry < PSYCHIATRY, PUBLIC HEALTH, QUALITATIVE RESEARCH, SOCIAL MEDICINE, STATISTICS & RESEARCH METHODS                                                                                                                                                                                                                                                                                                                                                                                                                                                        |
|                               |                                                                                                                                                                                                                                                                                                                                                                                                                                                                                                                                                                                                                              |

SCHOLARONE™  
Manuscripts

1  
2  
3 Collaborative research methods and best practice with children and young people: Protocol  
4 for a mixed-method review of the health and social sciences literature  
5  
6  
7  
8

9 <sup>1</sup>Nowland, R., <sup>2</sup>Robertson, L., <sup>3</sup>Farrelly, N., <sup>3</sup>Roy, A., <sup>4</sup>Sharpe, D., <sup>5</sup>Harris, C., <sup>4</sup>Morocza, N.  
10 & <sup>3</sup>Larkins, C.  
11  
12  
13  
14

15 WORD COUNT: 3770  
16  
17  
18  
19  
20  
21  
22  
23  
24  
25  
26  
27  
28

29 Corresponding author:

30 Rebecca Nowland, rnowland@uclan.ac.uk  
31  
32

33 Author affiliations:

- 34 1. School of Community Health and Midwifery, University of Central Lancashire,  
35 Preston, UK
- 36 2. Poverty Alliance, Glasgow, UK
- 37 3. School of Social Work, Care and Community, University of Central Lancashire,  
38 Preston, UK
- 39 4. Institute for Connected Communities, University of East London, UK
- 40 5. Applied Health Research Hub, University of Central Lancashire, Preston, UK  
41  
42  
43  
44  
45  
46  
47  
48  
49  
50  
51  
52  
53  
54  
55  
56  
57  
58  
59  
60

## Abstract

### Introduction

Children and young people have the right to participate in research on matters that affect them, and their contribution improves research quality and insights from findings. Discrete participatory approaches are used across different disciplines. This review will provide a synthesis of existing literature from different disciplines by working with young people and adults experienced in participatory research to develop a broad definition of child and youth led research and to identify best practice.

### Methods and Analysis

Comprehensive searches will be conducted in eight electronic databases (PsycINFO, Medline, CINAHL, Embase, SocINDEX, ASSIA: Applied Social Sciences Index and Abstracts (Proquest), Social Care Online and SCOPUS). Grey literature reports will also be sourced using Google searching. Eligible studies will be English language primary studies and reviews on collaborative research with children and young people (aged 5-25 years). Qualitative and quantitative data will be integrated in a single qualitative synthesis following the JBI convergent integrated approach. Study quality will be assessed by developed checklists based on existing participation tools co-created with the project steering group and co-creation activities with young people.

### Ethics and Dissemination

Ethical approval is not required as no primary data will be collected. The review will develop guidance on best practice for collaborative research with children and young people, synthesising learnings from a wide variety of disciplines. Dissemination will be via peer-reviewed publications, presentations at academic conferences and lay summaries for various stakeholders. Opportunities for co-creation of outputs will be sought with the young researchers and the project steering committee.

PROSPERO registration number: CRD42021246378

Key words: peer research; patient and public involvement; children; young people; youth participatory action research; YPAR

## Article Summary

### Strengths and limitations of the study

- First systematic review to synthesise findings across different approaches to collaborative research with children and young people
- Research focus, questions and analysis framework have been co-designed with young researchers experienced in participatory research
- Mixed method review methodology will enable an in-depth evidence synthesis across a disparate evidence base
- Provides an interdisciplinary perspective on best practice for collaborative research with children and young people

For peer review only

## Introduction

It is widely acknowledged that children and young people have the right to participate in research on matters that affect their lives, and that their contribution to research adds value to the research processes and outcomes. Involving children and young people as partners in the research process improves research design and refines research priorities, increases the accessibility and attractiveness of research methods and ensures that children and young people's perspectives are represented in analysis and outputs providing fresh insights and recommendations based on their lived experience.<sup>1</sup> The right to participate in research is implicit in the 1989 United Nation's Convention on the Rights of the Child.<sup>2</sup> It is articulated explicitly in the 2012 Council of Europe Recommendation on Children's Participation<sup>3</sup> which notes that member states (including the UK) should:

*stimulate research on, with and by children and young people, with a view to enabling better understanding of the views and experiences of children and young people, identifying obstacles to their participation and ways of overcoming them (3p9)*

The paradigm shift from 'research on' to 'research with and by children and young people' is of particular significance here as it covers approaches to health and social research that may be called 'participatory', in which children and young people take a greater or lesser lead in empirical studies. Increasingly research funders (e.g. Economic Social Research Council, National Institute for Health Research (NIHR)) are expecting children and young people to be research advisors and/or co-researchers, with statements of patient and public involvement being required in funding applications. For example, NIHR in their UK ten year plan for patient and public involvement and engagement published in 2015 commit to having "a population actively involved in research to improve health and wellbeing for themselves, their family and their communities" and the "public as partners in everything we do".<sup>4</sup> Since 2012, a number of systematic or mapping reviews have been conducted on participatory research, however apart from reviews by Rouncefield-Swales<sup>1</sup> and Wilson et al.<sup>5</sup> - which focus on health research - there has not been a synthesis involving different disciplines on participatory research in which children or young people collaborate with adult researchers and/or take a lead in particular aspects of the research. This review co-produced with young people and adults experienced in participatory research, develops a broad definition of collaborative research with children and young people (i.e. children and/or young people explicitly involved in at least one stage of the research process beyond just generating data and involvement in dissemination or recruitment of participants). It draws on learning from different disciplines/approaches, including Youth Participatory Action Research (YPAR), public and patient engagement, citizen science, community-based peer research and some forms of collaborative research with children and young people.

As mentioned, involving children and young people as collaborators in the research process not only impacts on research design and quality but it can also produce creative and situated forms of 'learning in action' (6p359) as well as 'reflexive processes of social engagement' (6p359), which create new spaces for generating and using knowledge.<sup>6</sup> However, achieving these potential benefits is known to be challenging as it can be hard to ensure that power is distributed, that children and young people's perspectives are valued, and that research is clearly linked into effective strategies for achieving personal and social change.<sup>7-10</sup> There continues to be a need for more guidance, particularly on collaborating with marginalised children and young people in ways that enables them to genuinely lead.<sup>11</sup>

1  
2  
3 In addition to being left out of knowledge production in the ways that adults experience (due  
4 to the intersections of 'race', ethnicity, gender, class, sexuality and disability), children and  
5 young people who experience discrimination through intersecting social ontologies, social  
6 categories and social relations face further marginalisation in research.<sup>12</sup> The exclusion of  
7 children and young people is pervasive due to dominant conceptions of children and young  
8 people as an homogenised social category represented as incompetent, vulnerable, politically  
9 immature and needing the completion of education in order to deserve recognition as citizens  
10 and as competent researchers.<sup>13</sup> Young people are often conceived of as apathetic or  
11 troublemakers, rather than recognising how young people are alienated by neo-liberal practices  
12 .<sup>14</sup> The battle over what counts as evidence<sup>15</sup> can also render children and young people's  
13 perspectives and sometimes their chosen means of expression, less valid than scientific  
14 orthodoxy.  
15  
16

17  
18 Where children and young people are included in research, they may be provided with  
19 information, or experience being 'researched on', however their influence over the priorities to  
20 investigate, and changes in guidance and practice is poorly evidenced. In 1999, Pole et al<sup>16</sup>  
21 noted that, despite the turn towards participatory methods across multiple disciplines, children  
22 and young people do not have enough research capital to make them serious stakeholders in  
23 the research process. Brownlie<sup>7</sup> repeated this, echoing the concern that "children and young  
24 people remain a long way from the emancipatory call of 'nothing about us, without us'"(7p711).  
25 And still, a decade on, Lohmeyer<sup>8</sup> repeats that "In theory, youth participatory methods are  
26 participant-led, and adults are involved in the process. However, there are social, historical,  
27 procedural and institutional barriers that make this ideal all but unachievable"(8p44). This is  
28 despite the fact that some young people are "keen as f\*\*k" to participate.<sup>8</sup>  
29  
30

31  
32 Unless these barriers to collaborative research with children and young people are fully  
33 understood and strategies for overcoming the challenges are shared, research risks being  
34 perpetuated as yet another form of symbolic violence.<sup>17 18</sup> That is, it will create conditions  
35 which perpetuate and normalise children and young people's subordinate position in processes  
36 of knowledge creation. Or, peer-led research may become a mechanism through which  
37 children and young people are exploited as lower paid or unpaid labour, to access young  
38 communities who are suspicious of mainstream health and social science research without  
39 allowing them power to identify what issues need investigating. There is therefore need for  
40 greater attention to the precise mechanisms, methods and reflexive stances which enable  
41 children and young people to lead research.<sup>18</sup>  
42  
43

44  
45 Questions remain, however, about the kind of knowledge that is generated by collaborative  
46 research methods and attention to what we mean by concepts such as knowledge and  
47 epistemology. Young researchers cocreate methods, including digital methods<sup>19</sup>, photo-  
48 walks<sup>20</sup>, map-making<sup>21</sup> and storytelling<sup>22</sup> which extend beyond traditional methods. Young  
49 researchers highlight that these methods are experienced positively by research participants<sup>23</sup>  
50 <sup>24</sup> and hence these co-creative approaches acknowledge shared responsibilities and skills in  
51 health and social research.<sup>25</sup> But these methods are not always valued by end users of research  
52 outputs, resulting in biases towards research that is not always congruent with children and  
53 young people's interests, concerns and contexts. Policy actors, funders and commissioners  
54 may need greater awareness of a diversity of approaches to rigour, quality and impact<sup>26</sup>, and  
55 may need to extend their understanding of health and social research to also recognise the  
56 validity that arises from greater degrees of participation.<sup>27</sup> Evidence that can demonstrate how  
57 the knowledge from collaborative research with children and young people can be valued by  
58 and acted on by decision-makers may therefore provide further benefits.  
59  
60

1  
2  
3  
4  
5  
6  
7  
8  
9  
10  
11  
12  
13  
14  
15  
16  
17  
18  
19  
20  
21  
22  
23  
24  
25  
26  
27  
28  
29  
30  
31  
32  
33  
34  
35  
36  
37  
38  
39  
40  
41  
42  
43  
44  
45  
46  
47  
48  
49  
50  
51  
52  
53  
54  
55  
56  
57  
58  
59  
60

What is needed is a synthesis of epistemologies and methodologies across a broad range of different disciplines to establish key contexts for successful research by and with children and young people. The current review addresses this gap by establishing precise mechanisms, methods and reflexive stances which enable children and young people to lead and collaborate as partners in research identifying best practice from existing evidence. The review will inform both researchers and policy actors, funders and commissioners of the diversity of approaches that may be appropriate to enable collaborative research with children and young people whilst maintaining academic rigour and quality. Barriers and challenges will be highlighted to ensure power imbalances are addressed and ways of working with marginalised groups will be identified. The review will be useful to guide future collaborative research with children and young people but will also identify key gaps in the evidence base where future work needs to be conducted.

### **Aim of the review**

To identify theoretical principles and practice modes and mechanisms of effective collaborative research with children and young people in the field of health and social sciences, that are generalisable as a basis for designing effective peer research projects, protocols and establishing best practice.

The mixed methods review will scope and synthesise existing knowledge about best practice in conducting collaborative research with children and young people using the following research questions co-created with young people and adults experienced in participatory research:

1. What are the opportunities, barriers and tensions in youth peer research and how can these be understood and addressed?
2. What are the different modes and mechanisms of doing peer research? Which of these are valued, by whom, in which contexts and why?
3. How is success, impact and change documented, understood, negotiated and evaluated in peer research?

Question 1 focusses specifically on issues identified by young people experienced in participatory research as critical involving *cushions* (e.g. negotiated support with tasks, skills, decision making and managing the emotional impact of conducting research), *credibility*, *collaboration* and *change*. More detailed sub-questions have been devised to address these highlighted issues:

- a) How do young and adult researchers ensure that young researchers have the *cushions* they want throughout the research process?
- b) Which processes and structures ensure *collaborative* peer research is acceptable and accessible to the diversity of children and young people (age, identity, experience of discrimination, economic situations)?
- c) How can we ensure that peer research is maximised in terms of strengthening claims to knowledge and *credibility*, conveying convincing stories, linking to current opportunities and minimising risk of negative attention?



- 1  
2  
3 d) Which processes and/or structures help ensure productive relationships between  
4 stakeholders, allies, contexts and resources to support the use of evidence to make  
5 *change* possible?  
6  
7

8 Ethics, safety, inclusion and power as themes relating to peer research will be considered across  
9 all research questions. We will also report on the topics into which peer research has been  
10 conducted and examine differences in modes, mechanisms and success across different topics.  
11  
12

## 13 **Methods and Analysis**

14  
15 This protocol is guided by the Preferred Items for Reporting of Systematic Reviews and Meta-  
16 Analyses Protocols (PRISMA) checklist<sup>28</sup> (online supplemental appendix 1) and the Joanna  
17 Briggs Institute (JBI) methodology for mixed-methods systematic reviews.<sup>29</sup>  
18  
19

### 20 **Study registration**

21  
22 Based on the PRISMA guidelines<sup>28</sup>, the protocol for this systematic review was registered on  
23 the international database of prospectively registered systematic reviews in health and social  
24 care, PROSPERO. Any important protocol amendments will be recorded in PROSPERO and  
25 published with the results of the review.  
26  
27

28 The mixed methods review will involve: 1) a systematic review of reviews on peer research  
29 and 2) realist synthesis of process and descriptive papers defined as those describing lessons  
30 learnt or a description of the programme, process or training of a peer model and articles that  
31 focused on the peers themselves and their experiences within a peer model/approach  
32 (distinction from Vaughn et al.<sup>30</sup>).  
33  
34

35 The systematic review of reviews will identify and establish the core models and methods used  
36 in collaborative research with children and young people and the realist synthesis will offer a  
37 more nuanced understanding of what works in peer research, for whom, in what contexts and  
38 why. Findings will be triangulated and used to develop a critical appraisal tool to assess peer  
39 research.  
40  
41

### 42 **Eligibility criteria**

43  
44 Studies and reviews will be selected according to the criteria set out below:  
45  
46

#### 47 **Types of studies**

48  
49 We will include systematic and scoping reviews, descriptive and process papers (using the  
50 distinction made by Vaughn et al.<sup>30</sup>) relating to peer research, including also grey literature  
51 reviews/reports. We will exclude papers that are exclusively empirical papers without  
52 description of process or reflections, dissertations, editorials, opinion pieces, commentaries,  
53 book or movie reviews, protocols, reports, case studies and erratum. We will only include  
54 studies about peer research with children and young people. We will exclude studies  
55 examining peer research in adult populations. Only studies written in English will be included  
56 and those published after 2000 (due to the exponential growth in young people's involvement  
57 in social research from 2000 onwards).  
58  
59  
60

1  
2  
3 We will use a wide definition of peer research and include all reviews and process/descriptive  
4 papers including a wide range of terms used to describe peer research (i.e. participatory  
5 research, YPAR, community-led research, peer research informed social action etc.).  
6  
7

## 8 Participants

9  
10 We will include peer research involving children and young people (aged 5-25 years) and  
11 exclude peer research conducted with adults. Articles about research with primary school aged  
12 children will be included to extrapolate potentially generalisable findings on peer research to  
13 an older population of children and young people, but we will be mindful of differences in  
14 developmental stages and needs.  
15

16  
17 Peer research (including community-based participatory research, peer led research, youth  
18 inquiry, co-production, citizen science, youth participatory action research, peer research  
19 informed social action).  
20

## 21 Outcomes

22  
23 Theoretical principles, practice and mechanisms and findings in relation to power, inclusivity,  
24 ethics, safeguarding, learning, methods, and impact.  
25

26  
27 We report on other important or critical factors and influencers of best practice in peer research  
28 highlighted by selected papers.  
29

## 30 Search strategy

31  
32 We recruited a review steering group involving participants from Youth Endowment Fund,  
33 study partners, appointed advisors and experienced young researchers from marginalised  
34 groups, academics experienced in youth participation and relevant third sector professionals  
35 and policy actors. Online discussions with this group (n = 18) were held in the form of a week-  
36 long civic hackathon<sup>(31)</sup>; creative problem-solving sessions conducted once a day (1 ½ hours  
37 long) for a full week in March 2021) involving activities to enable:  
38  
39

- 40 • Reflection and sharing of ideas about key concepts and challenges in peer research
- 41 • Reflection and definition of a proportionate systematic approach and relevant inclusion  
42 criteria
- 43 • Agreement of research questions, inquiry themes and focus for the review  
44  
45

46  
47 The findings from the online hackathon informed the focus of the research, search strategy,  
48 inclusion and exclusion criteria and framework for synthesis.  
49

50  
51 In addition, we conducted a priori scoping searches to identify key review papers in this specific  
52 research area which also informed our search strategy.  
53

54 We will use the Preferred Reporting Items for Systematic Review and Meta-Analysis checklist  
55 (PRISMA;<sup>32</sup>) as a framework for the review.  
56

57 We plan to conduct searches on eight bibliographic databases:  
58  
59  
60

1  
2  
3 PsycINFO, Medline, CINAHL, Embase, SocINDEX, ASSIA: Applied Social Sciences  
4 Index and Abstracts (Proquest), Social Care Online and SCOPUS  
5

6 Handsearching will also be used, involving forward and backward chaining and examination  
7 of references lists from reviews and key papers in this research area. We will also check  
8 author's personal files for any key studies. In accordance with PRISMA guidelines<sup>32</sup>, the  
9 number of search results will be recorded at each stage of the study identification process. In  
10 order to locate wider reviews on peer research that have been conducted we will include grey  
11 literature reports, which will be obtained through Google searching using the key words (first  
12 200 hits will be screened).  
13  
14

15  
16 The following search terms have been developed following a priori scoping exercises and  
17 online forum exercises with experienced young peer researchers and stakeholders:  
18

19 (Child/ or Adolescent/ or child or children or kid or kids or girl\* or boy\* or adolescen\*  
20 or teen\* or Youth\* young people or young adult or young person or young men or  
21 young women)  
22

23  
24 AND

25  
26 Community-based participatory research/ or participatory research\* or participatory  
27 method\* or participatory approach\* or participatory design or participatory model\* or  
28 user led research or peer led research or peer research\* or consumer led research or  
29 action research or youth inquir\* or co-produc\* or coproduc\* or co-research or  
30 coresearch or co-creation or cocreation or co-design\* or codesign\* or co-develop\* or  
31 codevelop\* or co-investigator\* or coinvestigator\* or citizen science or citizen scientist  
32 or YPAR or advisory group\* or advisory council or youth participation or young  
33 involved or child led research\* or peer model or research partner or social action)  
34  
35

36 The search strategy will be adapted to meet the truncation and Boolean operations of each  
37 database as appropriate. An example of the search strategy used for Medline database is  
38 presented (online supplemental appendix 2).  
39  
40

## 41 **Study Selection**

42  
43 Papers identified from database searches will be downloaded to Endnote and any duplicates  
44 removed. Screening by title and abstract will be conducted in Rayyan independently by one of  
45 the authors, with at least 20% of the papers screened by another author. Decisions will be based  
46 on the inclusion and exclusion criteria.  
47  
48

49 Once screening by title and abstract is complete, papers selected for full text screening will be  
50 sourced and then examined by one author independently, with at least 20% of the papers  
51 screened by another author. Reasons for exclusion will be noted at this stage.  
52  
53

54 Agreement at all stages will be made by consensus, and any disagreements regarding inclusion  
55 will be discussed with a third reviewer. Inter-rater reliability will be recorded at each screening  
56 stage (i.e. title, abstract and full text screening).  
57  
58

## 59 **Data extraction**

1  
2  
3 Following screening, data will be extracted from all selected texts using a data extraction sheet  
4 with a framework developed and co-created with the steering group. As suggested by Daudt,  
5 van Mossel, and Scott<sup>33</sup> (2013) at least 20% of data extracted will be charted by two authors  
6 independently using the data extraction tool. Once sufficient agreement (> 80%) has been  
7 reached in the test phase, authors will apply the tool to the remaining studies. Disagreements  
8 between the authors completing the data extraction will be resolved through discussion,  
9 including the involvement of a third reviewer where necessary. It is expected that data  
10 extraction will include key study characteristics, participant characteristics, definitions of peer  
11 research, models and mechanisms (focussing specifically on research approaches and  
12 processes identified in hackathon activities) relationships, attitudes, approaches, resources,  
13 distribution of leadership, timescales, and change) and co-created frameworks based on  
14 identified challenges and tensions in peer research centred on *cushions*, *credibility*,  
15 *collaboration* and *change*. We will also chart any other important or critical factors and  
16 influencers of best practice in peer research highlighted within selected papers.  
17  
18  
19

20  
21 During the data extraction stage, the research team will meet on a regular basis to discuss  
22 progress, and to consider decisions regarding the relevance and adequacy of the data collection  
23 tool. Those discussions will be documented along with any changes to the study protocol and  
24 data extraction. Study authors will be contacted if additional information is required (e.g.  
25 context related details of the study).  
26

### 27 **Assessment of Methodological Quality**

28  
29 Two authors will independently assess the research quality and bias of each of the included  
30 articles involving studies of peer research using developed checklists based on existing  
31 participation tools (e.g. Larkins et al.'s Participation Lattice<sup>34</sup>; Shier's analytical tool<sup>35</sup>) co-  
32 created with the steering group and based on the results of activities in the hackathon.  
33 Discrepancies between the review authors will be resolved by discussion, consulting a third  
34 review author where necessary.  
35  
36

37  
38 Two authors will independently assess the research quality and bias of all the review studies  
39 on peer research included using the AMSTAR 2 Appraisal Tool<sup>36</sup> for systematic reviews. Inter-  
40 rater reliability will be reported and any discrepancies between authors will be resolved through  
41 discussion or where necessary a third author will be consulted.  
42  
43

### 44 **Data synthesis**

45  
46 Data extracted will be collated, summarised and synthesised narratively. Data will be presented  
47 as tables, charts and/or visual maps in an aggregate rather than individual basis, to provide an  
48 overview of the research field, summarise findings, identify gaps in the literature and make  
49 recommendations for future research. Data analysis will be conducted in two phases: 1)  
50 narrative synthesis of theoretical principles (i.e. definitions of peer research) and  
51 mechanisms/methods used and 2) analysis of findings around the co-produced thematic  
52 framework *cushions*, *credibility*, *collaboration* and *change* and 3) content and thematic  
53 analysis using a co-created approach realist framework. We will explore youth characteristics  
54 and contextual factors that influence what works for peer research with young people.  
55  
56  
57  
58  
59  
60

## Patient and Public Involvement statement

The public were involved from the very start of developing the protocol. Young researchers and non-academic third sector professionals (service providers and funders) took part in a series of online discussions with academics. This was framed as a civic hackathon<sup>31</sup>, that is a series of online events held in quick succession, with the aim of identifying what is currently understood by the term peer research by and with children and young people, to explore the challenges and potential of these approaches and to create a set of questions to guide the review. Four online events were conducted, of around 90 minutes each, to frame the review. The events were facilitated by senior academics experienced in participatory research with young people. We used visual aids and online scribing to elicit the perspectives of young people and adults experienced in participatory research and then guest academics were asked to respond to this. At the end of every meeting we created a 3 minute summary of key discussion points and perspectives and shared this, along with the visual and text notes of the meeting, to support the participation of those who could not attend on specific days. Contributors to these non-synchronous discussions tended to be academics. At the start of every meeting we reviewed the story of our discussions so far, and summarised content that had been provided in between meetings. At the end of the third meeting, ideas generated to date were used to draft initial questions for the review. These were amended and finalised at the fourth meeting.

Whilst the review has been underway a further two online events have been held to discuss emerging findings and potential outputs and a further four events are planned to enable young researchers to contribute to at least one accessible output (an audio podcast has been planned) and all academic articles. Young people have decided that the podcast will be shared on an open access platform codesigned by young researchers for young researchers. All participants in these activities either contributed as part of paid roles or received a thank you in the form of vouchers.

## Ethics and Dissemination

Ethical approval and consent to participate are not required for the proposed systematic review as no primary data will be collected. The findings of the mixed methods review will be written up as a report which will directly inform peer research training for the Peer Research and Social Action Network, funded by the Youth Endowment Fund together with the #iwill Fund and the Co-op Foundation. The Peer Research and Social Action Network will support young people affected by violence to become Peer Researchers and Changemakers. We will also explore opportunities with youth peer researchers to co-create accessible outputs to be disseminated through peer research networks. We expect that the findings will be written up in peer reviewed academic journals as a systematic review of reviews, realist synthesis reviews of papers about processes of peer research, and intergenerational reflections on the review process.

## Authors Contributions:

CL is the guarantor. RN and CL drafted the manuscript. All authors contributed to the development of the selection criteria, the risk of bias assessment strategy and data extraction criteria. RN, CL and CH developed the search strategy. CL, LR, DS, and AR provided expertise on peer research with children and young people. RN and LR provided expertise on systematic review methodology. All authors read, provided feedback and approved the final manuscript.

### Funding statement:

This work was supported by a grant from the Youth Endowment Fund. The funders were not involved in the development of this review protocol.

### Competing interests statement:

None declared.

### Data statement:

Datasets (i.e. data extraction charts and analyses) will be available from the University of Central Lancashire's online repository (CLOK).

### Acknowledgements

The authors thank the project steering committee, youth and adult researchers experienced in peer research that inputted into the development of the research plan and protocol.

### References

1. Rouncefield-Swales A, Harris J, Carter B, et al. Children and young people's contributions to public involvement and engagement activities in health-related research: A scoping review. *PloS one* 2021;16(6):e0252774.
2. Assembly UG. Convention on the Rights of the Child. *United Nations, Treaty Series* 1989;1577(3):1-23.
3. Europe Co. Council of Europe Recommendation on the participation of children and young people under the age of 18 2012.
4. Denegri S, Coldham T, Eglin S, et al. Going the extra mile: improving the nation's health and wellbeing through public involvement in research. *London: NIHR* 2015
5. Wilson O, Daxenberger L, Dieudonne L, et al. A rapid evidence review of young people's involvement in health research. *London: Wellcome* 2020:3.
6. Percy-Smith B, Thomas NP, Batsleer J, et al. Everyday pedagogies: New perspectives on youth participation, social learning and citizenship. *Young People and the Struggle for Participation: Routledge* 2019:177-98.
7. Brownlie J. Researching, not playing, in the public sphere. *Sociology* 2009;43(4):699-716.
8. Lohmeyer BA. Keen as fuck': Youth participation in qualitative research as 'parallel projects. *Qualitative Research* 2020;20(1):39-55.
9. Powell MA, Graham A, McArthur M, et al. Children's participation in research on sensitive topics: addressing concerns of decision-makers. *Children's Geographies* 2020;18(3):325-38.
10. Tisdall EKM. Conceptualising children and young people's participation: Examining vulnerability, social accountability and co-production. *The International Journal of Human Rights* 2017;21(1):59-75.
11. INVOLVE. Report on Involving Children and Young People in Research 2019.



12. Anthias F. Intersectional what? Social divisions, intersectionality and levels of analysis. *Ethnicities* 2013;13(1):3-19.
13. Larkins C. Essential ingredients in child-and young-person-led research. Participation, citizenship and intergenerational relations in children and young people's lives: Children and adults in conversation: Springer 2014:109-16.
14. Furlong A, Cartmel F. Young people and social change: McGraw-Hill Education (UK) 2006.
15. Stevens A. When two dark figures collide: Evidence and discourse on drug-related crime. *Critical Social Policy* 2007;27(1):77-99.
16. Pole C, Mizen P, Bolton A. Realising children's agency in research: partners and participants? *International Journal of Social Research Methodology* 1999;2(1):39-54.
17. Kiili J, Larkins C. Invited to labour or participate: intra-and inter-generational distinctions and the role of capital in children's invited participation. *Discourse: Studies in the Cultural Politics of Education* 2018;39(3):408-21.
18. Roy A, Kennelly J, Rowley H, et al. A critical discussion of the use of film in participatory research projects with homeless young people: an analysis based on case examples from England and Canada. *Qualitative Research* 2021;21(6):957-74.
19. Sharpe D, Spyrou S, Akhtar S, editors. *Critical reflections: Merits of Co-producing Youth-centric Digital Technology in Keeping Young People Safe across Europe* London: Routledge, 2019.
20. Hughes J, Roy AN, Manley J. *Surviving in Manchester: Narratives on Movement from the Men's Room*, 2014.
21. Dake G, Roy A. Map-making and walking interviews: a psycho-social approach to researching with male sex workers. *Social Research Practice* 2018;5(5):12-23.
22. Satchwell C, Larkins C, Davidge G, et al. Stories as findings in collaborative research: making meaning through fictional writing with disadvantaged young people. *Qualitative Research* 2020;20(6):874-91.
23. Roy A. Learning on the move: exploring work with vulnerable young men through the lens of movement. *Applied Mobilities* 2016;1(2):207-18.
24. Roy A, Hughes J, Froggett L, et al. Using mobile methods to explore the lives of marginalised young men in Manchester. *Innovations in social work research London: Jessica Kingsley Publishers* 2015
25. Cuevas-Parra P, Tisdall EKM. Child-led research: Questioning knowledge. *Social Sciences* 2019;8(2):44.
26. OPM. *Creative Influence: Research Led by Young People*. Public Interest Research Report. London, 2010.
27. Spyrou S. *Disclosing Childhoods: Research and Knowledge Production for a Critical Childhood Studies*. Basingstoke: Palgrave Macmillan 2018.
28. Moher D, Shamseer L, Clarke M, et al. Preferred reporting items for systematic review and meta-analysis protocols (PRISMA-P) 2015 statement. *Systematic reviews* 2015;4(1):1-9.
29. Stern C, Lizarondo L, Carrier J, et al. Methodological guidance for the conduct of mixed methods systematic reviews. *JBI evidence synthesis* 2020;18(10):2108-18.
30. Vaughn LM, Whetstone C, Boards A, et al. Partnering with insiders: A review of peer models across community-engaged research, education and social care. *Health & social care in the community* 2018;26(6):769-86.
31. Yuan Q, Gasco-Hernandez M. Open innovation in the public sector: creating public value through civic hackathons. *Public Management Review* 2021;23(4):523-44.
32. Page MJ, McKenzie JE, Bossuyt PM, et al. The PRISMA 2020 statement: an updated guideline for reporting systematic reviews. *Bmj* 2021;372

- 1  
2  
3 33. Daudt HM, van Mossel C, Scott SJ. Enhancing the scoping study methodology: a large,  
4 inter-professional team's experience with Arksey and O'Malley's framework. *BMC*  
5 *medical research methodology* 2013;13(1):1-9.  
6  
7 34. Larkins C, Kiili J, Palsanen K. A lattice of participation: reflecting on examples of  
8 children's and young people's collective engagement in influencing social welfare  
9 policies and practices. *European Journal of Social Work* 2014;17(5):718-36.  
10  
11 35. Shier H, Berson I, Berson M, et al. An analytical tool to help researchers develop  
12 partnerships with children and adolescents. *Participatory methodologies to elevate*  
13 *children's voice and agency* 2019:295-316.  
14  
15 36. Shea BJ, Reeves BC, Wells G, et al. AMSTAR 2: a critical appraisal tool for systematic  
16 reviews that include randomised or non-randomised studies of healthcare interventions,  
17 or both. *bmj* 2017;358

18  
19  
20  
21  
22  
23  
24  
25  
26  
27  
28  
29  
30  
31  
32  
33  
34  
35  
36  
37  
38  
39  
40  
41  
42  
43  
44  
45  
46  
47  
48  
49  
50  
51  
52  
53  
54  
55  
56  
57  
58  
59  
60

For peer review only



**PRISMA-P (Preferred Reporting Items for Systematic review and Meta-Analysis Protocols) 2015 checklist: recommended items to address in a systematic review protocol\***

| Section and topic                 | Item No | Checklist item                                                                                                                                                                                                                | Page 1 |
|-----------------------------------|---------|-------------------------------------------------------------------------------------------------------------------------------------------------------------------------------------------------------------------------------|--------|
| <b>ADMINISTRATIVE INFORMATION</b> |         |                                                                                                                                                                                                                               |        |
| Title:                            |         |                                                                                                                                                                                                                               |        |
| Identification                    | 1a      | Identify the report as a protocol of a systematic review                                                                                                                                                                      | 1,7    |
| Update                            | 1b      | If the protocol is for an update of a previous systematic review, identify as such                                                                                                                                            | n/a    |
| Registration                      | 2       | If registered, provide the name of the registry (such as PROSPERO) and registration number                                                                                                                                    | 2      |
| Authors:                          |         |                                                                                                                                                                                                                               |        |
| Contact                           | 3a      | Provide name, institutional affiliation, e-mail address of all protocol authors; provide physical mailing address of corresponding author                                                                                     | 1      |
| Contributions                     | 3b      | Describe contributions of protocol authors and identify the guarantor of the review                                                                                                                                           | 11     |
| Amendments                        | 4       | If the protocol represents an amendment of a previously completed or published protocol, identify as such and list changes; otherwise, state plan for documenting important protocol amendments                               | n/a    |
| Support:                          |         |                                                                                                                                                                                                                               |        |
| Sources                           | 5a      | Indicate sources of financial or other support for the review                                                                                                                                                                 | 12     |
| Sponsor                           | 5b      | Provide name for the review funder and/or sponsor                                                                                                                                                                             | 12     |
| Role of sponsor or funder         | 5c      | Describe roles of funder(s), sponsor(s), and/or institution(s), if any, in developing the protocol                                                                                                                            | 12     |
| <b>INTRODUCTION</b>               |         |                                                                                                                                                                                                                               |        |
| Rationale                         | 6       | Describe the rationale for the review in the context of what is already known                                                                                                                                                 | 4-6    |
| Objectives                        | 7       | Provide an explicit statement of the question(s) the review will address with reference to participants, interventions, comparators, and outcomes (PICO)                                                                      | 6-7    |
| <b>METHODS</b>                    |         |                                                                                                                                                                                                                               |        |
| Eligibility criteria              | 8       | Specify the study characteristics (such as PICO, study design, setting, time frame) and report characteristics (such as years considered, language, publication status) to be used as criteria for eligibility for the review | 7-8    |
| Information sources               | 9       | Describe all intended information sources (such as electronic databases, contact with study authors, trial registers or other grey literature sources) with planned dates of coverage                                         | 8-9    |
| Search strategy                   | 10      | Present draft of search strategy to be used for at least one electronic database, including planned limits, such that it could be repeated                                                                                    | 8-9    |

|                                    |     |                                                                                                                                                                                                                                                           |     |
|------------------------------------|-----|-----------------------------------------------------------------------------------------------------------------------------------------------------------------------------------------------------------------------------------------------------------|-----|
| Study records:                     |     |                                                                                                                                                                                                                                                           |     |
| Data management                    | 11a | Describe the mechanism(s) that will be used to manage records and data throughout the review                                                                                                                                                              | 9   |
| Selection process                  | 11b | State the process that will be used for selecting studies (such as two independent reviewers) through each phase of the review (that is, screening, eligibility and inclusion in meta-analysis)                                                           | 9   |
| Data collection process            | 11c | Describe planned method of extracting data from reports (such as piloting forms, done independently, in duplicate), 10 any processes for obtaining and confirming data from investigators                                                                 | 10  |
| Data items                         | 12  | List and define all variables for which data will be sought (such as PICO items, funding sources), any pre-planned data assumptions and simplifications                                                                                                   | 10  |
| Outcomes and prioritization        | 13  | List and define all outcomes for which data will be sought, including prioritization of main and additional outcomes, with rationale                                                                                                                      | 10  |
| Risk of bias in individual studies | 14  | Describe anticipated methods for assessing risk of bias of individual studies, including whether this will be done at the outcome or study level, or both; state how this information will be used in data synthesis                                      | 10  |
| Data synthesis                     | 15a | Describe criteria under which study data will be quantitatively synthesised                                                                                                                                                                               | 10  |
|                                    | 15b | If data are appropriate for quantitative synthesis, describe planned summary measures, methods of handling data and methods of combining data from studies, including any planned exploration of consistency (such as I <sup>2</sup> , Kendall's $\tau$ ) | n/a |
|                                    | 15c | Describe any proposed additional analyses (such as sensitivity or subgroup analyses, meta-regression)                                                                                                                                                     | n/a |
|                                    | 15d | If quantitative synthesis is not appropriate, describe the type of summary planned                                                                                                                                                                        | 10  |
| Meta-bias(es)                      | 16  | Specify any planned assessment of meta-bias(es) (such as publication bias across studies, selective reporting within studies)                                                                                                                             | 10  |
| Confidence in cumulative evidence  | 17  | Describe how the strength of the body of evidence will be assessed (such as GRADE)                                                                                                                                                                        | 10  |

**\* It is strongly recommended that this checklist be read in conjunction with the PRISMA-P Explanation and Elaboration (cite when available) for important clarification on the items. Amendments to a review protocol should be tracked and dated. The copyright for PRISMA-P (including checklist) is held by the PRISMA-P Group and is distributed under a Creative Commons Attribution Licence 4.0.**

*From: Shamseer L, Moher D, Clarke M, Ghersi D, Liberati A, Petticrew M, Shekelle P, Stewart L, PRISMA-P Group. Preferred reporting items for systematic review and meta-analysis protocols (PRISMA-P) 2015: elaboration and explanation. BMJ. 2015 Jan 2;349(jan02 1):g7647.*

1  
2  
3 Database: Ovid MEDLINE(R) and Epub Ahead of Print, In-Process, In-Data-Review & Other Non-  
4 Indexed Citations and Daily <1946 to March 09, 2021>

5 Search Strategy:  
6  
7

- 8 -----  
9 1 Child/ (1723917)  
10 2 Adolescent/ (2073420)  
11 3 (child or children or kid or kids or girl\* or boy\*).tw. (1403418)  
12 4 (adolescen\* or teen\* or youth\$1).tw. (355741)  
13 5 (young adult\* or young person or young people).tw. (126562)  
14 6 or/1-5 (3516212)  
15 7 Community-Based Participatory Research/ (4691)  
16 8 (participatory adj (research\* or method\* or approach\* or design\* or model\*)).ti,ab,kw,kf.  
17 (6848)  
18 9 (user led research or peer led research or peer research\* or consumer led research or action  
19 research or youth inquir\*).ti,ab,kw,kf. (4670)  
20 10 (co-produc\* or coproduc\* or co-research\* or coresearch\* or co-creation or cocreation or co-  
21 design\* or codesign\* or co-develop\* or codevelop\* or co-investigator\* or  
22 coinvestigator\*).ti,ab,kw,kf. (8598)  
23 11 (citizen science or citizen scientist\*).ti,ab,kw,kf. (1505)  
24 12 (YPAR or ((youth or young or patient) adj2 (advisory group\* or advisory  
25 council\*))).ti,ab,kw,kf. (153)  
26 13 (youth adj2 (involvement or participation)).tw. (683)  
27 14 or/7-13 (23743)  
28 15 6 and 14 (4627)  
29 16 limit 15 to (english language and yr="2000 -Current") (4308)  
30  
31  
32  
33  
34  
35  
36  
37  
38  
39  
40

41 \*\*\*\*\*  
42  
43  
44  
45  
46  
47  
48  
49  
50  
51  
52  
53  
54  
55  
56  
57  
58  
59  
60

# BMJ Open

## Collaborative research methods and best practice with children and young people: protocol for a mixed-method review of the health and social sciences literature

|                                 |                                                                                                                                                                                                                                                                                                                                                                                                                                                                                                                                                                                                                              |
|---------------------------------|------------------------------------------------------------------------------------------------------------------------------------------------------------------------------------------------------------------------------------------------------------------------------------------------------------------------------------------------------------------------------------------------------------------------------------------------------------------------------------------------------------------------------------------------------------------------------------------------------------------------------|
| Journal:                        | <i>BMJ Open</i>                                                                                                                                                                                                                                                                                                                                                                                                                                                                                                                                                                                                              |
| Manuscript ID                   | bmjopen-2022-061659.R1                                                                                                                                                                                                                                                                                                                                                                                                                                                                                                                                                                                                       |
| Article Type:                   | Protocol                                                                                                                                                                                                                                                                                                                                                                                                                                                                                                                                                                                                                     |
| Date Submitted by the Author:   | 23-Aug-2022                                                                                                                                                                                                                                                                                                                                                                                                                                                                                                                                                                                                                  |
| Complete List of Authors:       | Nowland, Rebecca; University of Central Lancashire, School of Community Health and Midwifery<br>Robertson, Laura; Poverty Alliance<br>Farrelly, Nicola; University of Central Lancashire, School of Social Work<br>Roy, Alastair; University of Central Lancashire, School of Social Work<br>Sharpe, Darren; University of East London, Institute for health and Human Development<br>Harris, Cath; University of Central Lancashire, Applied Health Research Hub<br>Morocza, Nora; University of East London, Institute for Connected Communities<br>Larkins, Cath; University of Central Lancashire, School of Social Work |
| <b>Primary Subject Heading</b>: | Paediatrics                                                                                                                                                                                                                                                                                                                                                                                                                                                                                                                                                                                                                  |
| Secondary Subject Heading:      | Mental health, Health services research, Research methods                                                                                                                                                                                                                                                                                                                                                                                                                                                                                                                                                                    |
| Keywords:                       | Community child health < PAEDIATRICS, Child & adolescent psychiatry < PSYCHIATRY, PUBLIC HEALTH, QUALITATIVE RESEARCH, SOCIAL MEDICINE, STATISTICS & RESEARCH METHODS                                                                                                                                                                                                                                                                                                                                                                                                                                                        |
|                                 |                                                                                                                                                                                                                                                                                                                                                                                                                                                                                                                                                                                                                              |

SCHOLARONE™  
Manuscripts

1  
2  
3 **Collaborative research methods and best practice with children and young people:**  
4 **protocol for a mixed-method review of the health and social sciences literature**  
5  
6  
7  
8

9 <sup>1</sup>Nowland, R., <sup>2</sup>Robertson, L., <sup>3</sup>Farrelly, N., <sup>3</sup>Roy, A., <sup>4</sup>Sharpe, D., <sup>5</sup>Harris, C., <sup>4</sup>Morocza, N.  
10 & <sup>3</sup>Larkins, C.  
11  
12  
13

14 Affiliations:

- 15 1. School of Community Health and Midwifery, University of Central Lancashire,  
16 Preston, UK  
17 2. Poverty Alliance, Glasgow, UK  
18 3. School of Social Work, Care and Community, University of Central Lancashire,  
19 Preston, UK  
20 4. Institute for Connected Communities, University of East London, UK  
21 5. Applied Health Research Hub, University of Central Lancashire, Preston, UK  
22  
23  
24

25 Correspondence to:

26 Rebecca Nowland

27 rnowland@uclan.ac.uk  
28  
29  
30  
31  
32  
33  
34  
35  
36  
37  
38  
39  
40  
41  
42  
43  
44  
45  
46  
47  
48  
49  
50  
51  
52  
53  
54  
55  
56  
57  
58  
59  
60

## Abstract

### Introduction

Children and young people have the right to participate in research on matters that affect them, and their contribution improves research quality and insights from findings. Discrete participatory approaches are used across different disciplines. This review will provide a synthesis of existing literature from different disciplines by working with young people and adults experienced in participatory research to develop a broad definition of child and youth led research and to identify best practice.

### Methods and analysis

Comprehensive searches will be conducted in eight electronic databases (PsycINFO, Medline, CINAHL, Embase, SocINDEX, ASSIA: Applied Social Sciences Index and Abstracts (Proquest), Social Care Online and SCOPUS). Grey literature reports will also be sourced using Google searching. Eligible studies will be English-language primary studies and reviews on collaborative research with children and young people (aged 5-25 years) published from 2000 onwards. Qualitative and quantitative data will be integrated in a single qualitative synthesis following the JBI convergent integrated approach. Study quality will be assessed by developed checklists based on existing participation tools co-created with the project steering group and co-creation activities with young people.

### Ethics and dissemination

Ethical approval is not required as no primary data will be collected. The review will develop guidance on best practice for collaborative research with children and young people, synthesising learnings from a wide variety of disciplines. Dissemination will be via peer-reviewed publications, presentations at academic conferences and lay summaries for various stakeholders. Opportunities for co-creation of outputs will be sought with the young researchers and the project steering committee.

**PROSPERO registration number:** CRD42021246378.

**Keywords:** peer research; patient and public involvement; children; young people; youth participatory action research; YPAR

### Strengths and limitations of this study

- Research focus, questions and analysis framework have been co-designed with young researchers experienced in participatory research.
- Primary screening of the articles, data extraction and quality assessment will be performed independently by two persons to minimise the probability of personal biases.
- Mixed method review methodology will enable an in-depth evidence synthesis across a disparate evidence base.
- Databases in languages other than English (French, German, Chinese, etc) will not be searched or included which may cause language bias.
- There are limited critical appraisal tools to assess quality of co-created evidence bases that do not met the conventional standards.

## Introduction

It is widely acknowledged, across health and social sciences, that children and young people have the right to participate in research on matters that affect their lives, and that their contribution to research adds value to the research processes and outcomes. Involving children and young people as partners in the research process improves research design and refines research priorities, increases the accessibility and attractiveness of research methods and ensures that children and young people's perspectives are represented in analysis and outputs providing fresh insights and recommendations based on their lived experience.<sup>1</sup> The right to participate in research is implicit in the 1989 United Nation's Convention on the Rights of the Child.<sup>2</sup> It is articulated explicitly in the 2012 Council of Europe Recommendation on Children's Participation<sup>3</sup> which notes that member states (including the UK) should:

*stimulate research on, with and by children and young people, with a view to enabling better understanding of the views and experiences of children and young people, identifying obstacles to their participation and ways of overcoming them (3p9)*

The paradigm shift from 'research on' to 'research with and by children and young people' is of particular significance here as it covers approaches to research that may be called 'participatory', in which children and young people take a greater or lesser lead in empirical studies. Increasingly research funders (e.g. Economic Social Research Council, National Institute for Health Research (NIHR)) are expecting children and young people to be research advisors and/or co-researchers, with statements of patient and public involvement being required in funding applications. For example, NIHR in their UK ten year plan for patient and public involvement and engagement published in 2015 commit to having "a population actively involved in research to improve health and wellbeing for themselves, their family and their communities" and the "public as partners in everything we do".<sup>4</sup> Since 2012, a number of systematic or mapping reviews have been conducted on participatory research, however apart from reviews by Rouncefield-Swales<sup>1</sup> and Wilson et al.<sup>5</sup> - which focus on health research - there has not been a synthesis involving different disciplines on participatory research in which children or young people collaborate with adult researchers and/or take a lead in particular aspects of the research. The interdisciplinary approach in this review will enable a refined examination of best practice in collaborative research with children and young people by drawing on social science and health understandings of interpersonal relationships and contexts, as well as diverse methodologies. This review co-produced with young people and adults experienced in participatory research, develops a broad definition of collaborative research with children and young people (i.e. children and/or young people explicitly involved in at least one stage of the research process beyond just generating data and involvement in dissemination or recruitment of participants). It draws on learning from different disciplines/approaches, including Youth Participatory Action Research (YPAR), public and patient engagement, citizen science, community-based peer research and some forms of collaborative research with children and young people.

As mentioned, involving children and young people as collaborators in the research process not only impacts on research design and quality but it can also produce creative and situated forms of 'learning in action' (6p359) as well as 'reflexive processes of social engagement' (6p359), which create new spaces for generating and using knowledge.<sup>6</sup> However, achieving these potential benefits is known to be challenging as it can be hard to ensure that power is distributed, that children and young people's perspectives are valued, and that research is clearly linked into effective strategies for achieving personal and social change.<sup>7-10</sup> There



continues to be a need for more guidance, particularly on collaborating with marginalised children and young people in ways that enables them to genuinely lead.<sup>11</sup>

In addition to being left out of knowledge production in the ways that adults experience (due to the intersections of 'race', ethnicity, gender, class, sexuality and disability), children and young people who experience discrimination through intersecting social ontologies, social categories and social relations face further marginalisation in research.<sup>12</sup> The exclusion of children and young people is pervasive due to dominant conceptions of children and young people as an homogenised social category represented as incompetent, vulnerable, politically immature and needing the completion of education in order to deserve recognition as citizens and as competent researchers.<sup>13</sup> Young people are often conceived of as apathetic or troublemakers, rather than recognising how young people are alienated by neo-liberal practices.<sup>14</sup> The battle over what counts as evidence<sup>15</sup> can also render children and young people's perspectives and sometimes their chosen means of expression, less valid than scientific orthodoxy.

Where children and young people are included in research, they are provided with information but tend to experience being 'researched on'. Their influence over the research priorities to investigate, approaches to analysis and guidance on the use of research findings is less evidenced. In 1999, Pole et al<sup>16</sup> noted that, despite the turn towards participatory methods across multiple disciplines, children and young people do not have enough research capital to make them serious stakeholders in the research process. Brownlie<sup>7</sup> repeated this, echoing the concern that "children and young people remain a long way from the emancipatory call of 'nothing about us, without us'"<sup>(7p711)</sup>. And still, a decade on, Lohmeyer<sup>8</sup> repeats that "In theory, youth participatory methods are participant-led, and adults are involved in the process. However, there are social, historical, procedural and institutional barriers that make this ideal all but unachievable"<sup>(8p44)</sup>. This is despite the fact that some young people are "keen as f\*\*k" to participate.<sup>8</sup>

Unless these barriers to collaborative research with children and young people are fully understood and strategies for overcoming the challenges are shared, research risks being perpetuated as yet another form of symbolic violence.<sup>17 18</sup> That is, it will create conditions which perpetuate and normalise children and young people's subordinate position in processes of knowledge creation. Or, peer-led research may become a mechanism through which children and young people are exploited as lower paid or unpaid labour, to access young communities who are suspicious of mainstream health and social science research without allowing them power to identify what issues need investigating. There is therefore need for greater attention to the precise mechanisms, methods and reflexive stances which enable children and young people to lead research.<sup>18</sup>

Questions remain, however, about the kind of knowledge that is generated by collaborative research methods and attention to what we mean by concepts such as knowledge and epistemology. Young researchers cocreate methods, including digital methods<sup>19</sup>, photo-walks<sup>20</sup>, map-making<sup>21</sup> and storytelling<sup>22</sup> which extend beyond traditional methods. Young researchers highlight that these methods are experienced positively by research participants<sup>23 24</sup> and hence these co-creative approaches acknowledge shared responsibilities and skills in health and social research.<sup>25</sup> But these methods are not always valued by end users of research outputs, resulting in biases towards research that is not always congruent with children and young people's interests, concerns and contexts. Policy actors, funders and commissioners may need greater awareness of a diversity of approaches to rigour, quality and impact<sup>26</sup>, and may need to extend

1  
2  
3 their understanding of health and social research to also recognise the validity that arises from  
4 greater degrees of participation.<sup>27</sup> Evidence that can demonstrate how the knowledge from  
5 collaborative research with children and young people can be valued by and acted on by  
6 decision-makers may therefore provide further benefits.  
7

8  
9 What is needed is a synthesis of epistemologies and methodologies across a broad range of  
10 different disciplines to establish key contexts for successful research by and with children and  
11 young people. The current review addresses this gap by establishing precise mechanisms,  
12 methods and reflexive stances which enable children and young people to lead and collaborate  
13 as partners in research identifying best practice from existing evidence. The review will inform  
14 both researchers and policy actors, funders and commissioners of the diversity of approaches  
15 that may be appropriate to enable collaborative research with children and young people whilst  
16 maintaining academic rigour and quality. Barriers and challenges will be highlighted to ensure  
17 power imbalances are addressed and ways of working with marginalised groups will be  
18 identified. The review will be useful to guide future collaborative research with children and  
19 young people but will also identify key gaps in the evidence base where future work needs to  
20 be conducted.  
21  
22

### 23 24 **Aim of the review**

25  
26 To identify theoretical principles and practice modes and mechanisms of effective collaborative  
27 research with children and young people in the field of health and social sciences, that are  
28 generalisable as a basis for designing effective peer research projects, protocols and  
29 establishing best practice.  
30  
31

32 The mixed methods review will scope and synthesise existing knowledge about best practice  
33 in conducting collaborative research with children and young people using the following  
34 research questions co-created with young people and adults experienced in participatory  
35 research:  
36

- 37 1. What are the opportunities, barriers and tensions in collaborative research with children and  
38 young people and how can these be understood and addressed?  
39
- 40 2. What are the different modes and mechanisms of doing collaborative research with children  
41 and young people? Which of these are valued, by whom, in which contexts and why?  
42
- 43 3. How is success, impact and change documented, understood, negotiated and evaluated in  
44 collaborative research with children and young people?  
45  
46  
47

48 Question 1 focusses specifically on issues identified by young people experienced in  
49 participatory research as critical involving *cushions* (e.g. negotiated support with tasks, skills,  
50 decision making and managing the emotional impact of conducting research), *credibility*,  
51 *collaboration* and *change*. More detailed sub-questions have been devised to address these  
52 highlighted issues:  
53  
54

- 55 a) How do young and adult researchers ensure that young researchers have the *cushions*  
56 they want throughout the research process?  
57  
58  
59  
60

- 1  
2  
3  
4 b) Which processes and structures ensure *collaborative* research is acceptable and  
5 accessible to the diversity of children and young people (age, identity, experience of  
6 discrimination, economic situations)?  
7  
8 c) How can we ensure that collaborative research with children and young people is  
9 maximised in terms of strengthening claims to knowledge and *credibility*, conveying  
10 convincing stories, linking to current opportunities and minimising risk of negative  
11 attention?  
12  
13 d) Which processes and/or structures help ensure productive relationships between  
14 stakeholders, allies, contexts and resources to support the use of evidence to make  
15 *change* possible?  
16

17 Ethics, safety, inclusion and power as themes relating to peer research will be considered across  
18 all research questions. We will also report on the topics into which peer research has been  
19 conducted and examine differences in modes, mechanisms and success across different topics.  
20  
21

## 22 **Methods and analysis**

23  
24 This protocol is guided by the Preferred Items for Reporting of Systematic Reviews and Meta-  
25 Analyses Protocols (PRISMA) checklist<sup>28</sup> (online supplemental appendix 1), Joanna Briggs  
26 Institute (JBI) methodology for mixed-methods systematic reviews<sup>29</sup> and The Realist And  
27 Meta-narrative Evidence Syntheses – Evolving Standards (RAMESES) publication standards  
28 for realist syntheses and meta-narrative reviews.<sup>30</sup>  
29  
30

## 31 **Study registration**

32  
33 Based on the PRISMA guidelines<sup>28</sup>, the protocol for this systematic review was registered on  
34 the international database of prospectively registered systematic reviews in health and social  
35 care, PROSPERO. Any important protocol amendments will be recorded in PROSPERO and  
36 published with the results of the review.  
37  
38

39 Using the distinction of article types from Vaughn et al.<sup>31</sup> selected articles will be grouped into  
40 reviews, descriptive articles (those describing lessons learnt or a description of the programme)  
41 and process articles (process or training of a peer model) and articles that focused on the peers  
42 themselves and their experiences within a peer model/approach. The mixed methods review  
43 will involve: 1) a systematic review of the review articles and a 2) realist synthesis of the  
44 process, descriptive papers and those written by young co-researchers.  
45  
46

47 The systematic review of reviews will identify and establish the core models and methods used  
48 in collaborative research with children and young people and the realist synthesis will offer a  
49 more nuanced understanding of what works in collaborative research with children and young  
50 people for whom, in what contexts and why. Findings will be triangulated and used to develop  
51 a critical appraisal tool to assess collaborative research with children and young people.  
52  
53

## 54 **Eligibility criteria**

55  
56 Studies and reviews will be selected according to the criteria set out below:  
57  
58

59 Types of studies  
60

1  
2  
3 We will include systematic and scoping reviews, descriptive and process papers (using the  
4 distinction made by Vaughn et al.<sup>31</sup>) relating to peer research, including also grey literature  
5 reviews/reports. We will exclude papers that are exclusively empirical papers without  
6 description of process or reflections, dissertations, editorials, opinion pieces, commentaries,  
7 book or movie reviews, protocols, reports, case studies and erratum. We will only include  
8 studies about collaborative research with children and young people. We will exclude studies  
9 examining collaborative research in adult populations. Only studies written in English and only  
10 those published from 2000 (due to the expedient growth in young people's involvement in  
11 social research from 2000 onwards) will be included.  
12  
13

14 We will use a wide definition of collaborative research and include all reviews and  
15 process/descriptive papers including a wide range of terms used to describe this type of  
16 research (i.e. participatory research, community-led research, peer research informed social  
17 action, community-based participatory research, peer led research, youth inquiry, co-  
18 production, citizen science, youth participatory action research etc.).  
19  
20

## 21 Participants

22 We will include collaborative research with children and young people (aged 5-25 years) and  
23 exclude collaborative research conducted with adults. Articles about research with primary  
24 school aged children will be included to extrapolate potentially generalisable findings on peer  
25 research to an older population of children and young people, but we will be mindful of  
26 differences in developmental stages and needs.  
27  
28  
29

## 30 Outcomes

31 Theoretical principles, practice and mechanisms and findings in relation to power, inclusivity,  
32 ethics, safeguarding, learning, methods, and impact.  
33  
34

35 We report on other important or critical factors and influencers of best practice in peer research  
36 highlighted by selected papers.  
37  
38

## 39 Search strategy

40 We recruited a review steering group involving participants from Youth Endowment Fund,  
41 study partners, appointed advisors and experienced young researchers from marginalised  
42 groups, academics experienced in youth participation and relevant third sector professionals  
43 and policy actors. Online discussions with this group (n = 18) were held in the form of a week-  
44 long civic hackathon (<sup>32</sup>; creative problem-solving sessions conducted once a day (1 ½ hours  
45 long) for a full week in March 2021, also see Patient and Public Involvement Statement)  
46 involving activities to enable:  
47  
48  
49  
50  
51

- 52 • Reflection and sharing of ideas about key concepts and challenges in peer research
- 53 • Reflection and definition of a proportionate systematic approach and relevant inclusion  
54 criteria
- 55 • Agreement of research questions, inquiry themes and focus for the review  
56  
57

58 The findings from the online hackathon informed the focus of the research, search strategy,  
59 inclusion and exclusion criteria and framework for synthesis.  
60

1  
2  
3  
4 In addition, we conducted a priori scoping searches to identify key review papers in this specific  
5 research area which also informed our search strategy.  
6

7  
8 We will use the Preferred Reporting Items for Systematic Review and Meta-Analysis checklist  
9 (PRISMA<sup>33</sup>) as a framework for the review.  
10

11 We plan to conduct searches on eight bibliographic databases:

12  
13 PsycINFO, Medline, CINAHL, Embase, SocINDEX, ASSIA: Applied Social Sciences  
14 Index and Abstracts (Proquest), Social Care Online and SCOPUS  
15  
16

17 Handsearching will also be used, involving forward and backward chaining and examination  
18 of references lists from reviews and key papers in this research area. We will also check  
19 author's personal files for any key studies. In accordance with PRISMA guidelines<sup>33</sup>, the  
20 number of search results will be recorded at each stage of the study identification process. In  
21 order to locate wider reviews on peer research that have been conducted we will include grey  
22 literature reports, which will be obtained through Google searching using the key words (first  
23 200 hits will be screened).  
24  
25

26 The following search terms have been developed following a priori scoping exercises and  
27 online forum exercises with experienced young peer researchers and stakeholders:  
28

29 (Child/ or Adolescent/ or child or children or kid or kids or girl\* or boy\* or adolescen\*  
30 or teen\* or Youth\* young people or young adult or young person or young men or  
31 young women)  
32  
33

34 AND

35  
36 Community-based participatory research/ or participatory research\* or participatory  
37 method\* or participatory approach\* or participatory design or participatory model\* or  
38 user led research or peer led research or peer research\* or consumer led research or  
39 action research or youth inquir\* or co-produc\* or coproduc\* or co-research or  
40 coresearch or co-creation or cocreation or co-design\* or codesign\* or co-develop\* or  
41 codevelop\* or co-investigator\* or coinvestigator\* or citizen science or citizen scientist  
42 or YPAR or advisory group\* or advisory council or youth participation or young  
43 involved or child led research\* or peer model or research partner or social action)  
44  
45  
46

47 The search strategy will be adapted to meet the truncation and Boolean operations of each  
48 database as appropriate. The search strategy for each of the databases is presented (online  
49 supplemental appendix 2).  
50

## 51 **Study selection**

52  
53 Papers identified from database searches will be downloaded to Endnote and any duplicates  
54 removed. Screening by title and abstract will be conducted in Rayyan independently by one of  
55 the authors, with at least 20% of the papers screened by another author. Decisions will be based  
56 on the inclusion and exclusion criteria.  
57  
58  
59  
60



1  
2  
3 Once screening by title and abstract is complete, papers selected for full text screening will be  
4 sourced and then examined by one author independently, with at least 20% of the papers  
5 screened by another author. Reasons for exclusion will be noted at this stage.  
6

7  
8 Agreement at all stages will be made by consensus, and any disagreements regarding inclusion  
9 will be discussed with a third reviewer. Inter-rater reliability will be recorded at each screening  
10 stage (i.e. title, abstract and full text screening).  
11

## 12 **Data extraction**

13  
14  
15 Following screening, data will be extracted from all selected texts using data extraction sheets  
16 with a framework developed and co-created with the steering group. A separate data extraction  
17 tool will be used for the review papers. As suggested by Daudt, van Mossel, and Scott<sup>34</sup> (2013)  
18 at least 20% of data extracted will be charted by two authors independently using the data  
19 extraction tool. Once sufficient agreement (> 80%) has been reached in the test phase, authors  
20 will apply the tool to the remaining studies. Disagreements between the authors completing the  
21 data extraction will be resolved through discussion, including the involvement of a third  
22 reviewer where necessary. It is expected that data extraction will include key study  
23 characteristics, participant characteristics, definitions of collaborative research, context  
24 (geographical locations, service and community settings, and issues), models and mechanisms  
25 (focussing specifically on research approaches and processes identified in hackathon activities:  
26 relationships, attitudes, approaches, resources, distribution of leadership, timescales, and  
27 change) and data relating to the co-created frameworks based on identified challenges and  
28 tensions in peer research centred on *cushions*, *credibility*, *collaboration* and *change* (and other  
29 aspects relating to outcome). Data extraction will include verbatim quotes from articles. We  
30 will also chart any other important or critical factors and influencers of best practice in peer  
31 research highlighted within selected papers.  
32  
33

34  
35 During the data extraction stage, the research team will meet on a regular basis to discuss  
36 progress, and to consider decisions regarding the relevance and adequacy of the data collection  
37 tool. Those discussions will be documented along with any changes to the study protocol and  
38 data extraction. Study authors will be contacted if additional information is required (e.g.  
39 context related details of the study).  
40  
41

## 42 **Assessment of methodological quality**

43  
44 Two authors will independently assess the research quality and bias of each of the included  
45 articles involving studies of peer research using developed checklists based on existing  
46 participation tools (e.g. Larkins et al.'s Participation Lattice<sup>35</sup>; Shier's analytical tool<sup>36</sup>) co-  
47 created with the steering group and based on the results of activities in the hackathon. Using  
48 these frameworks enables a critical appraisal of the participation of young people in the studies  
49 rather than merely an assessment of research quality that is typically demonstrated by appraisal  
50 tools to incorporate that the knowledge generated by collaborative research and how it is  
51 reported does not always meet conventional standards of research quality. Discrepancies  
52 between the review authors will be resolved by discussion, consulting a third review author  
53 where necessary.  
54  
55

56  
57 Two authors will independently assess the research quality and bias of all the review articles  
58 included using the AMSTAR 2 Appraisal Tool<sup>37</sup> for systematic reviews. This tool is a  
59 necessary starting point for the review of reviews, to measure quality of protocol and reporting  
60

1  
2  
3 of systematic reviews. Adaptations of this tool will be developed alongside RAMESES, if  
4 needed, to enable incorporation of wider literature (i.e. grey literature reports, realist reviews).  
5 Inter-rater reliability will be reported and any discrepancies between authors will be resolved  
6 through discussion or where necessary a third author will be consulted.  
7  
8

### 9 **Data synthesis**

10  
11 Data extracted will be collated, summarised and synthesised narratively. Data will be presented  
12 as tables, charts and/or visual maps in an aggregate rather than individual basis, to provide an  
13 overview of the research field, summarise findings, identify gaps in the literature and make  
14 recommendations for future research. Data analysis will be conducted in two phases: 1)  
15 narrative synthesis of theoretical principles (i.e. definitions of peer research) and  
16 mechanisms/methods used and 2) analysis of findings around contexts and the co-produced  
17 thematic framework *cushions*, *credibility*, *collaboration* and *change* and 3) content and  
18 thematic analysis using a co-created realist framework. We will explore youth characteristics  
19 and contextual factors that influence what works for collaborative research with children and  
20 young people. The realist review will aim to provide a theory outlining the contexts and  
21 mechanisms and particular young people where collaborative research enables participation  
22 and influence, placing specific emphasis on typically marginalised youth. The findings across  
23 the different reviews will be collated into an accessible report focussing on identifying best  
24 practice for collaborative research with children and young people.  
25  
26  
27  
28

### 29 **Patient and public involvement**

30  
31 The public were involved from the very start of developing the protocol. Young researchers  
32 and non-academic third sector professionals (service providers and funders) took part in a series  
33 of online discussions with academics. This was framed as a civic hackathon<sup>32</sup>, that is a series  
34 of online events held in quick succession, with the aim of identifying what is currently  
35 understood by the term peer research by and with children and young people, to explore the  
36 challenges and potential of these approaches and to create a set of questions to guide the review.  
37 Four online events were conducted, of around 90 minutes each, to frame the review. The events  
38 were facilitated by senior academics experienced in participatory research with young people.  
39 We used visual aids and online scribing to elicit the perspectives of young people and adults  
40 experienced in participatory research and then guest academics were asked to respond to this.  
41 At the end of every meeting we created a 3 minute summary of key discussion points and  
42 perspectives and shared this, along with the visual and text notes of the meeting, to support the  
43 participation of those who could not attend on specific days. Contributors to these non-  
44 synchronous discussions tended to be academics. At the start of every meeting we reviewed  
45 the story of our discussions so far, and summarised content that had been provided in between  
46 meetings. At the end of the third meeting, ideas generated to date were used to draft initial  
47 questions for the review. These were amended and finalised at the fourth meeting.  
48  
49  
50  
51

52 Whilst the review has been underway a further two online events have been held to discuss  
53 emerging findings and potential outputs and a further four events are planned to enable young  
54 researchers to contribute to at least one accessible output (an audio podcast has been planned)  
55 and all academic articles. Young people have decided that the podcast will be shared on an  
56 open access platform codesigned by young researchers for young researchers. All participants  
57 in these activities either contributed as part of paid roles or received a thank you in the form of  
58 vouchers.  
59  
60

## Ethics and dissemination

Ethical approval and consent to participate are not required for the proposed systematic review as no primary data will be collected. Collaborative work with the experienced young researchers was conducted as part of an ongoing university research collaboration network. Young people receive information about the network and each activity. They, and their parents if under 16, provide signed consent to join the network and verbal consent to participate in any given activity. The findings of the mixed methods review will be written up as a report which will directly inform peer research training for the Peer Research and Social Action Network, funded by the Youth Endowment Fund together with the #iwill Fund and the Co-op Foundation. The Peer Research and Social Action Network will support young people affected by violence to become Peer Researchers and Changemakers. We will also explore opportunities with youth peer researchers to co-create accessible outputs to be disseminated through peer research networks. We expect that the findings will be written up in peer reviewed academic journals as a systematic review of reviews, realist synthesis reviews of papers about processes of peer research, and intergenerational reflections on the review process.

## Contributors

CL is the guarantor. RN and CL drafted the manuscript. All authors contributed to the development of the selection criteria, the risk of bias assessment strategy and data extraction criteria. RN, CL and CH developed the search strategy. CL, LR, DS, NF, NM and AR provided expertise on peer research with children and young people. RN and LR provided expertise on systematic review methodology. All authors read, provided feedback and approved the final manuscript.

## Funding

This work was supported by a grant from the Youth Endowment Fund. The funders were not involved in the development of this review protocol.

## Competing interests

None declared.

## Data availability statement

Datasets (i.e. data extraction charts and analyses) will be available from the University of Central Lancashire's online repository (CLOK).

## Acknowledgments

The authors thank the project steering committee, youth and adult researchers experienced in peer research that inputted into the development of the research plan and protocol.



## References

1. Rouncefield-Swales A, Harris J, Carter B, et al. Children and young people's contributions to public involvement and engagement activities in health-related research: A scoping review. *PLoS one* 2021;16(6):e0252774.
2. Assembly UG. Convention on the Rights of the Child. *United Nations, Treaty Series* 1989;1577(3):1-23.
3. Europe Co. Council of Europe Recommendation on the participation of children and young people under the age of 18 2012.
4. Denegri S, Coldham T, Eglin S, et al. Going the extra mile: improving the nation's health and wellbeing through public involvement in research. *London: NIHR* 2015
5. Wilson O, Daxenberger L, Dieudonne L, et al. A rapid evidence review of young people's involvement in health research. *London: Wellcome* 2020:3.
6. Percy-Smith B, Thomas NP, Batsleer J, et al. Everyday pedagogies: New perspectives on youth participation, social learning and citizenship. *Young People and the Struggle for Participation: Routledge* 2019:177-98.
7. Brownlie J. Researching, not playing, in the public sphere. *Sociology* 2009;43(4):699-716.
8. Lohmeyer BA. Keen as fuck': Youth participation in qualitative research as 'parallel projects. *Qualitative Research* 2020;20(1):39-55.
9. Powell MA, Graham A, McArthur M, et al. Children's participation in research on sensitive topics: addressing concerns of decision-makers. *Children's Geographies* 2020;18(3):325-38.
10. Tisdall EKM. Conceptualising children and young people's participation: Examining vulnerability, social accountability and co-production. *The International Journal of Human Rights* 2017;21(1):59-75.
11. INVOLVE. Report on Involving Children and Young People in Research 2019.
12. Anthias F. Intersectional what? Social divisions, intersectionality and levels of analysis. *Ethnicities* 2013;13(1):3-19.
13. Larkins C. Essential ingredients in child-and young-person-led research. Participation, citizenship and intergenerational relations in children and young people's lives: Children and adults in conversation: Springer 2014:109-16.
14. Furlong A, Cartmel F. Young people and social change: McGraw-Hill Education (UK) 2006.
15. Stevens A. When two dark figures collide: Evidence and discourse on drug-related crime. *Critical Social Policy* 2007;27(1):77-99.
16. Pole C, Mizen P, Bolton A. Realising children's agency in research: partners and participants? *International Journal of Social Research Methodology* 1999;2(1):39-54.
17. Kiili J, Larkins C. Invited to labour or participate: intra-and inter-generational distinctions and the role of capital in children's invited participation. *Discourse: Studies in the Cultural Politics of Education* 2018;39(3):408-21.
18. Roy A, Kennelly J, Rowley H, et al. A critical discussion of the use of film in participatory research projects with homeless young people: an analysis based on case examples from England and Canada. *Qualitative Research* 2021;21(6):957-74.
19. Sharpe D, Spyrou S, Akhtar S, editors. *Critical reflections: Merits of Co-producing Youth-centric Digital Technology in Keeping Young People Safe across Europe* London: Routledge, 2019.
20. Hughes J, Roy AN, Manley J. Surviving in Manchester: Narratives on Movement from the Men's Room, 2014.
21. Dake G, Roy A. Map-making and walking interviews: a psycho-social approach to researching with male sex workers. *Social Research Practice* 2018;5(5):12-23.
22. Satchwell C, Larkins C, Davidge G, et al. Stories as findings in collaborative research: making meaning through fictional writing with disadvantaged young people. *Qualitative Research* 2020;20(6):874-91.

23. Roy A. Learning on the move: exploring work with vulnerable young men through the lens of movement. *Applied Mobilities* 2016;1(2):207-18.
24. Roy A, Hughes J, Froggett L, et al. Using mobile methods to explore the lives of marginalised young men in Manchester. *Innovations in social work research London: Jessica Kingsley Publishers* 2015
25. Cuevas-Parra P, Tisdall EKM. Child-led research: Questioning knowledge. *Social Sciences* 2019;8(2):44.
26. OPM. Creative Influence: Research Led by Young People. Public Interest Research Report. London, 2010.
27. Spyrou S. Disclosing Childhoods: Research and Knowledge Production for a Critical Childhood Studies. Basingstoke: Palgrave Macmillan 2018.
28. Moher D, Shamseer L, Clarke M, et al. Preferred reporting items for systematic review and meta-analysis protocols (PRISMA-P) 2015 statement. *Systematic reviews* 2015;4(1):1-9.
29. Stern C, Lizarondo L, Carrier J, et al. Methodological guidance for the conduct of mixed methods systematic reviews. *JBI evidence synthesis* 2020;18(10):2108-18.
30. Wong G GT, Westhrop G, Pawson R. Development of methodological guidance, publication standards and training materials for realist and meta-narrative reviews: The RAMESES (Realist And Meta-narrative Evidence Syntheses: Evolving Standards) project. . *Health Serv Deliv Res* 2014;2(30)
31. Vaughn LM, Whetstone C, Boards A, et al. Partnering with insiders: A review of peer models across community-engaged research, education and social care. *Health & social care in the community* 2018;26(6):769-86.
32. Yuan Q, Gasco-Hernandez M. Open innovation in the public sector: creating public value through civic hackathons. *Public Management Review* 2021;23(4):523-44.
33. Page MJ, McKenzie JE, Bossuyt PM, et al. The PRISMA 2020 statement: an updated guideline for reporting systematic reviews. *Bmj* 2021;372
34. Daudt HM, van Mossel C, Scott SJ. Enhancing the scoping study methodology: a large, inter-professional team's experience with Arksey and O'Malley's framework. *BMC medical research methodology* 2013;13(1):1-9.
35. Larkins C, Kiili J, Palsanen K. A lattice of participation: reflecting on examples of children's and young people's collective engagement in influencing social welfare policies and practices. *European Journal of Social Work* 2014;17(5):718-36.
36. Shier H, Berson I, Berson M, et al. An analytical tool to help researchers develop partnerships with children and adolescents. *Participatory methodologies to elevate children's voice and agency* 2019:295-316.
37. Shea BJ, Reeves BC, Wells G, et al. AMSTAR 2: a critical appraisal tool for systematic reviews that include randomised or non-randomised studies of healthcare interventions, or both. *bmj* 2017;358

**PRISMA-P (Preferred Reporting Items for Systematic review and Meta-Analysis Protocols) 2015 checklist: recommended items to address in a systematic review protocol\***

| Section and topic                 | Item No | Checklist item                                                                                                                                                                                                                | Section                    |
|-----------------------------------|---------|-------------------------------------------------------------------------------------------------------------------------------------------------------------------------------------------------------------------------------|----------------------------|
| <b>ADMINISTRATIVE INFORMATION</b> |         |                                                                                                                                                                                                                               |                            |
| Title:                            |         |                                                                                                                                                                                                                               |                            |
| Identification                    | 1a      | Identify the report as a protocol of a systematic review                                                                                                                                                                      | Title, Method              |
| Update                            | 1b      | If the protocol is for an update of a previous systematic review, identify as such                                                                                                                                            | n/a                        |
| Registration                      | 2       | If registered, provide the name of the registry (such as PROSPERO) and registration number                                                                                                                                    | Method: study registration |
| Authors:                          |         |                                                                                                                                                                                                                               |                            |
| Contact                           | 3a      | Provide name, institutional affiliation, e-mail address of all protocol authors; provide physical mailing address of corresponding author                                                                                     | Title page                 |
| Contributions                     | 3b      | Describe contributions of protocol authors and identify the guarantor of the review                                                                                                                                           | Authors contributions      |
| Amendments                        | 4       | If the protocol represents an amendment of a previously completed or published protocol, identify as such and list changes; otherwise, state plan for documenting important protocol amendments                               | n/a                        |
| Support:                          |         |                                                                                                                                                                                                                               |                            |
| Sources                           | 5a      | Indicate sources of financial or other support for the review                                                                                                                                                                 | Funding statement          |
| Sponsor                           | 5b      | Provide name for the review funder and/or sponsor                                                                                                                                                                             | Funding statement          |
| Role of sponsor or funder         | 5c      | Describe roles of funder(s), sponsor(s), and/or institution(s), if any, in developing the protocol                                                                                                                            | Funding statement          |
| <b>INTRODUCTION</b>               |         |                                                                                                                                                                                                                               |                            |
| Rationale                         | 6       | Describe the rationale for the review in the context of what is already known                                                                                                                                                 | Introduction               |
| Objectives                        | 7       | Provide an explicit statement of the question(s) the review will address with reference to participants, interventions, comparators, and outcomes (PICO)                                                                      | Aims of the review         |
| <b>METHODS</b>                    |         |                                                                                                                                                                                                                               |                            |
| Eligibility criteria              | 8       | Specify the study characteristics (such as PICO, study design, setting, time frame) and report characteristics (such as years considered, language, publication status) to be used as criteria for eligibility for the review | Method                     |
| Information sources               | 9       | Describe all intended information sources (such as electronic databases, contact with study authors, trial registers or other grey literature sources) with planned dates of coverage                                         | Search strategy            |
| Search strategy                   | 10      | Present draft of search strategy to be used for at least one electronic database, including planned limits, such that it could be repeated                                                                                    | Supplementary info         |

|                                    |     |                                                                                                                                                                                                                                                  |                                                                |
|------------------------------------|-----|--------------------------------------------------------------------------------------------------------------------------------------------------------------------------------------------------------------------------------------------------|----------------------------------------------------------------|
| Study records:                     |     |                                                                                                                                                                                                                                                  |                                                                |
| Data management                    | 11a | Describe the mechanism(s) that will be used to manage records and data throughout the review                                                                                                                                                     | Method                                                         |
| Selection process                  | 11b | State the process that will be used for selecting studies (such as two independent reviewers) through each phase of the review (that is, screening, eligibility and inclusion in meta-analysis)                                                  | Method                                                         |
| Data collection process            | 11c | Describe planned method of extracting data from reports (such as piloting forms, done independently, in duplicate), any processes for obtaining and confirming data from investigators                                                           | Method: data extraction                                        |
| Data items                         | 12  | List and define all variables for which data will be sought (such as PICO items, funding sources), any pre-planned data assumptions and simplifications                                                                                          | Method: data extraction                                        |
| Outcomes and prioritization        | 13  | List and define all outcomes for which data will be sought, including prioritization of main and additional outcomes, with rationale                                                                                                             | Method: data extraction                                        |
| Risk of bias in individual studies | 14  | Describe anticipated methods for assessing risk of bias of individual studies, including whether this will be done at the outcome or study level, or both; state how this information will be used in data synthesis                             | Assessment of methodological quality                           |
| Data synthesis                     | 15a | Describe criteria under which study data will be quantitatively synthesised                                                                                                                                                                      | Method: data synthesis                                         |
|                                    | 15b | If data are appropriate for quantitative synthesis, describe planned summary measures, methods of handling data and methods of combining data from studies, including any planned exploration of consistency (such as $I^2$ , Kendall's $\tau$ ) | n/a                                                            |
|                                    | 15c | Describe any proposed additional analyses (such as sensitivity or subgroup analyses, meta-regression)                                                                                                                                            | n/a                                                            |
|                                    | 15d | If quantitative synthesis is not appropriate, describe the type of summary planned                                                                                                                                                               | Method: data synthesis                                         |
| Meta-bias(es)                      | 16  | Specify any planned assessment of meta-bias(es) (such as publication bias across studies, selective reporting within studies)                                                                                                                    | Method: data synthesis                                         |
| Confidence in cumulative evidence  | 17  | Describe how the strength of the body of evidence will be assessed (such as GRADE)                                                                                                                                                               | Method: data synthesis<br>Assessment of methodological quality |

**\* It is strongly recommended that this checklist be read in conjunction with the PRISMA-P Explanation and Elaboration (cite when available) for important clarification on the items. Amendments to a review protocol should be tracked and dated. The copyright for PRISMA-P (including checklist) is held by the PRISMA-P Group and is distributed under a Creative Commons Attribution Licence 4.0.**

*From: Shamseer L, Moher D, Clarke M, Ghersi D, Liberati A, Petticrew M, Shekelle P, Stewart L, PRISMA-P Group. Preferred reporting items for systematic review and meta-analysis protocols (PRISMA-P) 2015: elaboration and explanation. BMJ. 2015 Jan 2;349(jan02 1):g7647.*

## Full Search strategies for each database

## Medline

| Search Number | Query                                                                                                                                                                                                            |
|---------------|------------------------------------------------------------------------------------------------------------------------------------------------------------------------------------------------------------------|
| 1             | Child/                                                                                                                                                                                                           |
| 2             | Adolescent/                                                                                                                                                                                                      |
| 3             | (child or children or kid or kids or girl* or boy*).tw.                                                                                                                                                          |
| 4             | (adolescen* or teen* or youth\$1).tw.                                                                                                                                                                            |
| 5             | (young adult* or young person or young people or young women or young men).tw.                                                                                                                                   |
| 6             | or/1-5                                                                                                                                                                                                           |
| 7             | Community-Based Participatory Research/                                                                                                                                                                          |
| 8             | (participatory adj (research* or method* or approach* or design* or model*)).ti,ab,kw,kf.                                                                                                                        |
| 9             | (user led research or peer led research or child led research or youth led research or peer model* or peer research* or consumer led research or action research or social action or youth inquir*).ti,ab,kw,kf. |
| 10            | (co-produc* or coproduc* or co-research* or coresearch* or co-creation or cocreation or co-design* or codesign* or co-develop* or codevelop* or co-investigator* or coinvestigator*).ti,ab,kw,kf.                |
| 11            | (citizen science or citizen scientist*).ti,ab,kw,kf.                                                                                                                                                             |
| 12            | (YPAR or ((youth or young or patient) adj2 (advisory group* or advisory council*))).ti,ab,kw,kf.                                                                                                                 |
| 13            | (youth adj2 (involvement or participation)).tw.                                                                                                                                                                  |
| 14            | (research adj2 partner*).tw.                                                                                                                                                                                     |
| 15            | or/7-14                                                                                                                                                                                                          |
| 16            | 6 and 15                                                                                                                                                                                                         |
| 17            | limit 16 to (english language and yr="2000 -Current")                                                                                                                                                            |

## Embase

| Search Number | Query                                                                                                                                                                                                         |
|---------------|---------------------------------------------------------------------------------------------------------------------------------------------------------------------------------------------------------------|
| 1             | child/                                                                                                                                                                                                        |
| 2             | adolescent/                                                                                                                                                                                                   |
| 3             | (child or children or kid or kids or girl* or boy*).tw.                                                                                                                                                       |
| 4             | (adolescen* or teen* or youth\$1).tw.                                                                                                                                                                         |
| 5             | (young adult* or young person or young people or young women or young men).tw.                                                                                                                                |
| 6             | or/1-5                                                                                                                                                                                                        |
| 7             | participatory research/                                                                                                                                                                                       |
| 8             | (participatory adj (research* or method* or approach* or design* or model*)).ti,ab,kw.                                                                                                                        |
| 9             | (user led research or peer led research or child led research or youth led research or peer model* or peer research* or consumer led research or action research or social action or youth inquir*).ti,ab,kw. |
| 10            | (co-produc* or coproduc* or co-research* or coresearch* or co-creation or cocreation or co-design* or codesign* or co-develop* or codevelop* or co-investigator* or coinvestigator*).ti,ab,kw.                |
| 11            | (citizen science or citizen scientist*).ti,ab,kw.                                                                                                                                                             |
| 12            | (YPAR or ((youth or young or patient) adj2 (advisory group* or advisory council*))).ti,ab,kw.                                                                                                                 |
| 13            | (youth adj2 (involvement or participation)).tw.                                                                                                                                                               |
| 14            | (research adj2 partner*).tw.                                                                                                                                                                                  |
| 15            | or/7-14                                                                                                                                                                                                       |
| 16            | 6 and 15                                                                                                                                                                                                      |
| 17            | limit 16 to (english language and yr="2000 -Current")                                                                                                                                                         |

## CINAHL

| Search Number | Query                                                                                                                                                                                                                  |
|---------------|------------------------------------------------------------------------------------------------------------------------------------------------------------------------------------------------------------------------|
| S1            | (MH "Child")                                                                                                                                                                                                           |
| S2            | (MH "Adolescence")                                                                                                                                                                                                     |
| S3            | child or children or kid or kids or girl* or boy*                                                                                                                                                                      |
| S4            | adolescen* or teen* or youth*                                                                                                                                                                                          |
| S5            | "young adult*" or "young person" or "young people" or "young women" or "young men"                                                                                                                                     |
| S6            | S1 OR S2 OR S3 OR S4 OR S5                                                                                                                                                                                             |
| S7            | participatory N1 (research* or method* or approach* or design* or model*)                                                                                                                                              |
| S8            | "user led research" or "peer led research" or "child led research" or "youth led research" or "peer model*" or "peer research*" or "consumer led research" or "action research" or "social action" or "youth inquir**" |
| S9            | "co-produc**" or coproduc* or "co-research*" or coresearch* or "co-creation" or cocreation or "co-design*" or codesign* or "co-develop*" or codevelop* or "co-investigator*" or coinvestigator*                        |
| S10           | "citizen science" or "citizen scientist**"                                                                                                                                                                             |
| S11           | YPAR                                                                                                                                                                                                                   |
| S12           | (youth or young or patient) N2 (advisory group* or advisory council*)                                                                                                                                                  |
| S13           | youth N2 (involvement or participation)                                                                                                                                                                                |
| S14           | research N2 partner*                                                                                                                                                                                                   |
| S15           | S7 OR S8 OR S9 OR S10 OR S11 OR S12 OR S13 OR S14                                                                                                                                                                      |
| S16           | S6 AND S15                                                                                                                                                                                                             |
| S17           | Published Date: 20000101-; English Language                                                                                                                                                                            |

## SocINDEX

| Search Number | Query                                                                                                                                                                                                                  |
|---------------|------------------------------------------------------------------------------------------------------------------------------------------------------------------------------------------------------------------------|
| S1            | DE "CHILDREN" OR DE "ADOLESCENCE"                                                                                                                                                                                      |
| S2            | child or children or kid or kids or girl* or boy*                                                                                                                                                                      |
| S3            | adolescen* or teen* or youth*                                                                                                                                                                                          |
| S4            | "young adult*" or "young person" or "young people" or "young women" or "young men"                                                                                                                                     |
| S5            | S1 OR S2 OR S3 OR S4                                                                                                                                                                                                   |
| S6            | DE "COMMUNITY-based participatory research"                                                                                                                                                                            |
| S7            | participatory N1 (research* or method* or approach* or design* or model*)                                                                                                                                              |
| S8            | "user led research" or "peer led research" or "child led research" or "youth led research" or "peer model*" or "peer research*" or "consumer led research" or "action research" or "social action" or "youth inquir**" |
| S9            | "co-produc**" or coproduc* or "co-research*" or coresearch* or "co-creation" or cocreation or "co-design*" or codesign* or "co-develop*" or codevelop* or "co-investigator*" or coinvestigator*                        |
| S10           | "citizen science" or "citizen scientist**"                                                                                                                                                                             |
| S11           | YPAR                                                                                                                                                                                                                   |
| S12           | (youth or young or patient) N2 ("advisory group*" or "advisory council**")                                                                                                                                             |
| S13           | youth N2 (involvement or participation)                                                                                                                                                                                |
| S14           | research N2 partner*                                                                                                                                                                                                   |
| S15           | S6 OR S7 OR S8 OR S9 OR S10 OR S11 OR S12 OR S13 OR S14                                                                                                                                                                |
| S16           | S5 AND S15                                                                                                                                                                                                             |
| S17           | Date of Publication: 20000101-                                                                                                                                                                                         |



## PyscINFO

| Search Number | Query                                                                                                                                                                                                                 |
|---------------|-----------------------------------------------------------------------------------------------------------------------------------------------------------------------------------------------------------------------|
| S1            | child or children or kid or kids or girl* or boy*                                                                                                                                                                     |
| S2            | adolescen* or teen* or youth*                                                                                                                                                                                         |
| S3            | "young adult*" or "young person" or "young people" or "young women" or "young men"                                                                                                                                    |
| S4            | S1 OR S2 OR S3                                                                                                                                                                                                        |
| S5            | participatory N1 (research* or method* or approach* or design* or model*)                                                                                                                                             |
| S6            | "user led research" or "peer led research" or "child led research" or "youth led research" or "peer model*" or "peer research*" or "consumer led research" or "action research" or "social action" or "youth inquir*" |
| S7            | "co-produc*" or coproduc* or "co-research*" or coresearch* or "co-creation" or cocreation or "co-design*" or codesign* or "co-develop*" or codevelop* or "co-investigator*" or coinvestigator*                        |
| S8            | "citizen science" or "citizen scientist*"                                                                                                                                                                             |
| S9            | YPAR                                                                                                                                                                                                                  |
| S10           | (youth or young or patient) N2 ("advisory group*" or "advisory council*")                                                                                                                                             |
| S11           | youth N2 (involvement or participation)                                                                                                                                                                               |
| S12           | research N2 partner*                                                                                                                                                                                                  |
| S13           | S5 OR S6 OR S7 OR S8 OR S9 OR S10 OR S11 OR S12                                                                                                                                                                       |
| S14           | S4 AND S13                                                                                                                                                                                                            |
| S15           | Limiters - Publication Year: 2000-; English                                                                                                                                                                           |

## ASSIA

| Query                                                                                                                                                                                                                                                                                                                                                                                                                                                                                                                                                                                                                                                                                                                                                                                                                                                                                                                                                                                                                                                                                                                                                                                                                                                                                                                                                                                                                                                                                                                                                                                                                                                                                                                                                                                                                                                                                                                                                        |
|--------------------------------------------------------------------------------------------------------------------------------------------------------------------------------------------------------------------------------------------------------------------------------------------------------------------------------------------------------------------------------------------------------------------------------------------------------------------------------------------------------------------------------------------------------------------------------------------------------------------------------------------------------------------------------------------------------------------------------------------------------------------------------------------------------------------------------------------------------------------------------------------------------------------------------------------------------------------------------------------------------------------------------------------------------------------------------------------------------------------------------------------------------------------------------------------------------------------------------------------------------------------------------------------------------------------------------------------------------------------------------------------------------------------------------------------------------------------------------------------------------------------------------------------------------------------------------------------------------------------------------------------------------------------------------------------------------------------------------------------------------------------------------------------------------------------------------------------------------------------------------------------------------------------------------------------------------------|
| (TI(child or children or kid or kids or girl* or boy* or adolescen* or teen* or youth* or "young adult*" or "young person" or "young people" or "young women" or "young men") or AB(child or children or kid or kids or girl* or boy* or adolescen* or teen* or youth* or "young adult*" or "young person" or "young people" or "young women" or "young men")) AND ((TI("participatory research*" or "participatory method*" or "participatory approach*" or "participatory design*" or "participatory model*" or "user led research" or "peer led research" or "child led research" or "youth led research" or "peer model*" or "peer research*" or "consumer led research" or "action research" or "social action" or "youth inquir*" or co-produc* or coproduc* or co-research* or coresearch* or co-creation or cocreation or co-design* or codesign* or co-develop* or codevelop* or co-investigator* or coinvestigator* or "citizen science" or "citizen scientist*" or YPAR) OR AB("participatory research*" or "participatory method*" or "participatory approach*" or "participatory design*" or "participatory model*" or "user led research" or "peer led research" or "child led research" or "youth led research" or "peer model*" or "peer research*" or "consumer led research" or "action research" or "social action" or "youth inquir*" or co-produc* or coproduc* or co-research* or coresearch* or co-creation or cocreation or co-design* or codesign* or co-develop* or codevelop* or co-investigator* or coinvestigator* or "citizen science" or "citizen scientist*" or YPAR)) OR (TI((youth or young or patient) NEAR/2 ("advisory group*" or "advisory council*")) OR AB((youth or young or patient) NEAR/2 ("advisory group*" or "advisory council*"))) OR (TI(youth NEAR/2 (involvement or participation)) OR AB(youth NEAR/2 (involvement or participation))) OR (TI(research NEAR/2 partner*) OR AB(research NEAR/2 partner*)) |

## Scopus

## Query

( TITLE-ABS-KEY ( child OR children OR kid OR kids OR girl\* OR boy\* OR adolescen\* OR teen\* OR youth\* OR "young adult\*" OR "young person" OR "young people" OR "young women" OR "young men" ) ) AND ( TITLE-ABS-KEY ( ( "participatory research\*" OR "participatory method\*" OR "participatory approach\*" OR "participatory design\*" OR "participatory model\*" OR "user led research" OR "peer led research" OR "child led research" OR "youth led research" OR "peer model\*" OR "peer research\*" OR "consumer led research" OR "action research" OR "social action" OR "youth inquir\*" OR "co-produc\*" OR coproduc\* OR "co-research\*" OR coresearch\* OR "co-creation" OR cocreation OR "co-design\*" OR codesign\* OR "co-develop\*" OR codevelop\* OR "co-investigator\*" OR coinvestigator\* OR "citizen science" OR "citizen scientist\*" OR ypar ) OR ( ( youth OR young OR patient ) W/2 ( "advisory group\*" OR "advisory council\*" ) ) OR ( youth W/2 ( involvement OR participation ) ) OR ( research W/2 partner\* ) ) ) AND ( LIMIT-TO ( PUBYEAR , 2021 ) OR LIMIT-TO ( PUBYEAR , 2020 ) OR LIMIT-TO ( PUBYEAR , 2019 ) OR LIMIT-TO ( PUBYEAR , 2018 ) OR LIMIT-TO ( PUBYEAR , 2017 ) OR LIMIT-TO ( PUBYEAR , 2016 ) OR LIMIT-TO ( PUBYEAR , 2015 ) OR LIMIT-TO ( PUBYEAR , 2014 ) OR LIMIT-TO ( PUBYEAR , 2013 ) OR LIMIT-TO ( PUBYEAR , 2012 ) OR LIMIT-TO ( PUBYEAR , 2011 ) OR LIMIT-TO ( PUBYEAR , 2010 ) OR LIMIT-TO ( PUBYEAR , 2009 ) OR LIMIT-TO ( PUBYEAR , 2008 ) OR LIMIT-TO ( PUBYEAR , 2007 ) OR LIMIT-TO ( PUBYEAR , 2006 ) OR LIMIT-TO ( PUBYEAR , 2005 ) OR LIMIT-TO ( PUBYEAR , 2004 ) OR LIMIT-TO ( PUBYEAR , 2003 ) OR LIMIT-TO ( PUBYEAR , 2002 ) OR LIMIT-TO ( PUBYEAR , 2001 ) OR LIMIT-TO ( PUBYEAR , 2000 ) ) AND ( LIMIT-TO ( LANGUAGE , "English" ) ) )



## Social Care Online

## Query

( TITLE-ABS-KEY ( child OR children OR kid OR kids OR girl\* OR boy\* OR adolescen\* OR teen\* OR youth\* OR "young adult\*" OR "young person" OR "young people" OR "young women" OR "young men" ) ) AND ( TITLE-ABS-KEY ( ( "participatory research\*" OR "participatory method\*" OR "participatory approach\*" OR "participatory design\*" OR "participatory model\*" OR "user led research" OR "peer led research" OR "child led research" OR "youth led research" OR "peer model\*" OR "peer research\*" OR "consumer led research" OR "action research" OR "social action" OR "youth inquir\*" OR "co-produc\*" OR coproduc\* OR "co-research\*" OR coresearch\* OR "co-creation" OR cocreation OR "co-design\*" OR codesign\* OR "co-develop\*" OR codevelop\* OR "co-investigator\*" OR coinvestigator\* OR "citizen science" OR "citizen scientist\*" OR ypar ) OR ( ( youth OR young OR patient ) W/2 ( "advisory group\*" OR "advisory council\*" ) ) OR ( youth W/2 ( involvement OR participation ) ) OR ( research W/2 partner\* ) ) ) AND ( LIMIT-TO ( PUBYEAR , 2021 ) OR LIMIT-TO ( PUBYEAR , 2020 ) OR LIMIT-TO ( PUBYEAR , 2019 ) OR LIMIT-TO ( PUBYEAR , 2018 ) OR LIMIT-TO ( PUBYEAR , 2017 ) OR LIMIT-TO ( PUBYEAR , 2016 ) OR LIMIT-TO ( PUBYEAR , 2015 ) OR LIMIT-TO ( PUBYEAR , 2014 ) OR LIMIT-TO ( PUBYEAR , 2013 ) OR LIMIT-TO ( PUBYEAR , 2012 ) OR LIMIT-TO ( PUBYEAR , 2011 ) OR LIMIT-TO ( PUBYEAR , 2010 ) OR LIMIT-TO ( PUBYEAR , 2009 ) OR LIMIT-TO ( PUBYEAR , 2008 ) OR LIMIT-TO ( PUBYEAR , 2007 ) OR LIMIT-TO ( PUBYEAR , 2006 ) OR LIMIT-TO ( PUBYEAR , 2005 ) OR LIMIT-TO ( PUBYEAR , 2004 ) OR LIMIT-TO ( PUBYEAR , 2003 ) OR LIMIT-TO ( PUBYEAR , 2002 ) OR LIMIT-TO ( PUBYEAR , 2001 ) OR LIMIT-TO ( PUBYEAR , 2000 ) ) AND ( LIMIT-TO ( LANGUAGE , "English" ) ) )
