# Supplementary material for: Collaborative research methods and best practice with children and young people: protocol for a mixed-method review of the health and social sciences literature
Source: HighWire-hosted journal article supplement (doi:10.1136/bmjopen-2022-061659), 2022-10-01
Supplement: bmjopen-2022-061659supp002_data_supplement.pdf [file bmjopen-2022-061659supp002_data_supplement.pdf]

## Full Search strategies for each database

## Medline

| Search Number | Query                                                                                                                                                                                                            |
|---------------|------------------------------------------------------------------------------------------------------------------------------------------------------------------------------------------------------------------|
| 1             | Child/                                                                                                                                                                                                           |
| 2             | Adolescent/                                                                                                                                                                                                      |
| 3             | (child or children or kid or kids or girl* or boy*).tw.                                                                                                                                                          |
| 4             | (adolescen* or teen* or youth\$1).tw.                                                                                                                                                                            |
| 5             | (young adult* or young person or young people or young women or young men).tw.                                                                                                                                   |
| 6             | or/1-5                                                                                                                                                                                                           |
| 7             | Community-Based Participatory Research/                                                                                                                                                                          |
| 8             | (participatory adj (research* or method* or approach* or design* or model*)).ti,ab,kw,kf.                                                                                                                        |
| 9             | (user led research or peer led research or child led research or youth led research or peer model* or peer research* or consumer led research or action research or social action or youth inquir*).ti,ab,kw,kf. |
| 10            | (co-produc* or coproduc* or co-research* or coresearch* or co-creation or cocreation or co-design* or codesign* or co-develop* or codevelop* or co-investigator* or coinvestigator*).ti,ab,kw,kf.                |
| 11            | (citizen science or citizen scientist*).ti,ab,kw,kf.                                                                                                                                                             |
| 12            | (YPAR or ((youth or young or patient) adj2 (advisory group* or advisory council*))).ti,ab,kw,kf.                                                                                                                 |
| 13            | (youth adj2 (involvement or participation)).tw.                                                                                                                                                                  |
| 14            | (research adj2 partner*).tw.                                                                                                                                                                                     |
| 15            | or/7-14                                                                                                                                                                                                          |
| 16            | 6 and 15                                                                                                                                                                                                         |
| 17            | limit 16 to (english language and yr="2000 -Current")                                                                                                                                                            |

## Embase

| Search Number | Query                                                                                                                                                                                                         |
|---------------|---------------------------------------------------------------------------------------------------------------------------------------------------------------------------------------------------------------|
| 1             | child/                                                                                                                                                                                                        |
| 2             | adolescent/                                                                                                                                                                                                   |
| 3             | (child or children or kid or kids or girl* or boy*).tw.                                                                                                                                                       |
| 4             | (adolescen* or teen* or youth\$1).tw.                                                                                                                                                                         |
| 5             | (young adult* or young person or young people or young women or young men).tw.                                                                                                                                |
| 6             | or/1-5                                                                                                                                                                                                        |
| 7             | participatory research/                                                                                                                                                                                       |
| 8             | (participatory adj (research* or method* or approach* or design* or model*)).ti,ab,kw.                                                                                                                        |
| 9             | (user led research or peer led research or child led research or youth led research or peer model* or peer research* or consumer led research or action research or social action or youth inquir*).ti,ab,kw. |
| 10            | (co-produc* or coproduc* or co-research* or coresearch* or co-creation or cocreation or co-design* or codesign* or co-develop* or codevelop* or co-investigator* or coinvestigator*).ti,ab,kw.                |
| 11            | (citizen science or citizen scientist*).ti,ab,kw.                                                                                                                                                             |
| 12            | (YPAR or ((youth or young or patient) adj2 (advisory group* or advisory council*))).ti,ab,kw.                                                                                                                 |
| 13            | (youth adj2 (involvement or participation)).tw.                                                                                                                                                               |
| 14            | (research adj2 partner*).tw.                                                                                                                                                                                  |
| 15            | or/7-14                                                                                                                                                                                                       |
| 16            | 6 and 15                                                                                                                                                                                                      |
| 17            | limit 16 to (english language and yr="2000 -Current")                                                                                                                                                         |

## CINAHL

| Search Number | Query                                                                                                                                                                                                                 |
|---------------|-----------------------------------------------------------------------------------------------------------------------------------------------------------------------------------------------------------------------|
| S1            | (MH "Child")                                                                                                                                                                                                          |
| S2            | (MH "Adolescence")                                                                                                                                                                                                    |
| S3            | child or children or kid or kids or girl* or boy*                                                                                                                                                                     |
| S4            | adolescen* or teen* or youth*                                                                                                                                                                                         |
| S5            | "young adult*" or "young person" or "young people" or "young women" or "young men"                                                                                                                                    |
| S6            | S1 OR S2 OR S3 OR S4 OR S5                                                                                                                                                                                            |
| S7            | participatory N1 (research* or method* or approach* or design* or model*)                                                                                                                                             |
| S8            | "user led research" or "peer led research" or "child led research" or "youth led research" or "peer model*" or "peer research*" or "consumer led research" or "action research" or "social action" or "youth inquir*" |
| S9            | "co-produc*" or coproduc* or "co-research*" or coresearch* or "co-creation" or cocreation or "co-design*" or codesign* or "co-develop*" or codevelop* or "co-investigator*" or coinvestigator*                        |
| S10           | "citizen science" or "citizen scientist*"                                                                                                                                                                             |
| S11           | YPAR                                                                                                                                                                                                                  |
| S12           | (youth or young or patient) N2 (advisory group* or advisory council*)                                                                                                                                                 |
| S13           | youth N2 (involvement or participation)                                                                                                                                                                               |
| S14           | research N2 partner*                                                                                                                                                                                                  |
| S15           | S7 OR S8 OR S9 OR S10 OR S11 OR S12 OR S13 OR S14                                                                                                                                                                     |
| S16           | S6 AND S15                                                                                                                                                                                                            |
| S17           | Published Date: 20000101-; English Language                                                                                                                                                                           |

## SocINDEX

| Search Number | Query                                                                                                                                                                                                                 |
|---------------|-----------------------------------------------------------------------------------------------------------------------------------------------------------------------------------------------------------------------|
| S1            | DE "CHILDREN" OR DE "ADOLESCENCE"                                                                                                                                                                                     |
| S2            | child or children or kid or kids or girl* or boy*                                                                                                                                                                     |
| S3            | adolescen* or teen* or youth*                                                                                                                                                                                         |
| S4            | "young adult*" or "young person" or "young people" or "young women" or "young men"                                                                                                                                    |
| S5            | S1 OR S2 OR S3 OR S4                                                                                                                                                                                                  |
| S6            | DE "COMMUNITY-based participatory research"                                                                                                                                                                           |
| S7            | participatory N1 (research* or method* or approach* or design* or model*)                                                                                                                                             |
| S8            | "user led research" or "peer led research" or "child led research" or "youth led research" or "peer model*" or "peer research*" or "consumer led research" or "action research" or "social action" or "youth inquir*" |
| S9            | "co-produc*" or coproduc* or "co-research*" or coresearch* or "co-creation" or cocreation or "co-design*" or codesign* or "co-develop*" or codevelop* or "co-investigator*" or coinvestigator*                        |
| S10           | "citizen science" or "citizen scientist*"                                                                                                                                                                             |
| S11           | YPAR                                                                                                                                                                                                                  |
| S12           | (youth or young or patient) N2 ("advisory group*" or "advisory council*")                                                                                                                                             |
| S13           | youth N2 (involvement or participation)                                                                                                                                                                               |
| S14           | research N2 partner*                                                                                                                                                                                                  |
| S15           | S6 OR S7 OR S8 OR S9 OR S10 OR S11 OR S12 OR S13 OR S14                                                                                                                                                               |
| S16           | S5 AND S15                                                                                                                                                                                                            |
| S17           | Date of Publication: 20000101-                                                                                                                                                                                        |

## PysclINFO

| Search Number | Query                                                                                                                                                                                                                 |
|---------------|-----------------------------------------------------------------------------------------------------------------------------------------------------------------------------------------------------------------------|
| S1            | child or children or kid or kids or girl* or boy*                                                                                                                                                                     |
| S2            | adolescen* or teen* or youth*                                                                                                                                                                                         |
| S3            | "young adult*" or "young person" or "young people" or "young women" or "young men"                                                                                                                                    |
| S4            | S1 OR S2 OR S3                                                                                                                                                                                                        |
| S5            | participatory N1 (research* or method* or approach* or design* or model*)                                                                                                                                             |
| S6            | "user led research" or "peer led research" or "child led research" or "youth led research" or "peer model*" or "peer research*" or "consumer led research" or "action research" or "social action" or "youth inquir*" |
| S7            | "co-produc*" or coproduc* or "co-research*" or coresearch* or "co-creation" or cocreation or "co-design*" or codesign* or "co-develop*" or codevelop* or "co-investigator*" or coinvestigator*                        |
| S8            | "citizen science" or "citizen scientist*"                                                                                                                                                                             |
| S9            | YPAR                                                                                                                                                                                                                  |
| S10           | (youth or young or patient) N2 ("advisory group*" or "advisory council*")                                                                                                                                             |
| S11           | youth N2 (involvement or participation)                                                                                                                                                                               |
| S12           | research N2 partner*                                                                                                                                                                                                  |
| S13           | S5 OR S6 OR S7 OR S8 OR S9 OR S10 OR S11 OR S12                                                                                                                                                                       |
| S14           | S4 AND S13                                                                                                                                                                                                            |
| S15           | Limiters - Publication Year: 2000-; English                                                                                                                                                                           |

## ASSIA

| Query                                                                                                                                                                                                                                                                                                                                                                                                                                                                                                                                                                                                                                                                                                                                                                                                                                                                                                                                                                                                                                                                                                                                                                                                                                                                                                                                                                                                                                                                                                                                                                                                                                                                                                                                                                                                                                                                                                                                                         |
|---------------------------------------------------------------------------------------------------------------------------------------------------------------------------------------------------------------------------------------------------------------------------------------------------------------------------------------------------------------------------------------------------------------------------------------------------------------------------------------------------------------------------------------------------------------------------------------------------------------------------------------------------------------------------------------------------------------------------------------------------------------------------------------------------------------------------------------------------------------------------------------------------------------------------------------------------------------------------------------------------------------------------------------------------------------------------------------------------------------------------------------------------------------------------------------------------------------------------------------------------------------------------------------------------------------------------------------------------------------------------------------------------------------------------------------------------------------------------------------------------------------------------------------------------------------------------------------------------------------------------------------------------------------------------------------------------------------------------------------------------------------------------------------------------------------------------------------------------------------------------------------------------------------------------------------------------------------|
| (TI(child or children or kid or kids or girl* or boy* or adolescen* or teen* or youth* or "young adult*" or "young person" or "young people" or "young women" or "young men") or AB(child or children or kid or kids or girl* or boy* or adolescen* or teen* or youth* or "young adult*" or "young person" or "young people" or "young women" or "young men")) AND ((TI("participatory research*" or "participatory method*" or "participatory approach*" or "participatory design*" or "participatory model*" or "user led research" or "peer led research" or "child led research" or "youth led research" or "peer model*" or "peer research*" or "consumer led research" or "action research" or "social action" or "youth inquir*" or co-produc* or coproduc* or co-research* or coresearch* or co-creation or cocreation or co-design* or codesign* or co-develop* or codevelop* or co-investigator* or coinvestigator* or "citizen science" or "citizen scientist*" or YPAR) OR AB("participatory research*" or "participatory method*" or "participatory approach*" or "participatory design*" or "participatory model*" or "user led research" or "peer led research" or "child led research" or "youth led research" or "peer model*" or "peer research*" or "consumer led research" or "action research" or "social action" or "youth inquir*" or co-produc* or coproduc* or co-research* or coresearch* or co-creation or cocreation or co-design* or codesign* or co-develop* or codevelop* or co-investigator* or coinvestigator* or "citizen science" or "citizen scientist*" or YPAR)) OR (TI((youth or young or patient) NEAR/2 ("advisory group*" or "advisory council*")) OR AB((youth or young or patient) NEAR/2 ("advisory group*" or "advisory council*"))) OR (TI(youth NEAR/2 (involvement or participation)) OR AB(youth NEAR/2 (involvement or participation))) OR (TI(research NEAR/2 partner*) OR AB(research NEAR/2 partner*))) |

## Scopus

| Query                                                                                                                                                                                                                                                                                                                                                                                                                                                                                                                                                                                                                                                                                                                                                                                                                                                                                                                                                                                                                                                                                                                                                                                                                                                                                                                                                                                                                                                                                                                                                                                                                                                                                                                                                                             |
|-----------------------------------------------------------------------------------------------------------------------------------------------------------------------------------------------------------------------------------------------------------------------------------------------------------------------------------------------------------------------------------------------------------------------------------------------------------------------------------------------------------------------------------------------------------------------------------------------------------------------------------------------------------------------------------------------------------------------------------------------------------------------------------------------------------------------------------------------------------------------------------------------------------------------------------------------------------------------------------------------------------------------------------------------------------------------------------------------------------------------------------------------------------------------------------------------------------------------------------------------------------------------------------------------------------------------------------------------------------------------------------------------------------------------------------------------------------------------------------------------------------------------------------------------------------------------------------------------------------------------------------------------------------------------------------------------------------------------------------------------------------------------------------|
| ( TITLE-ABS-KEY ( child OR children OR kid OR kids OR girl* OR boy* OR adolescen* OR teen* OR youth* OR "young adult*" OR "young person" OR "young people" OR "young women" OR "young men" ) ) AND ( TITLE-ABS-KEY ( ( "participatory research*" OR "participatory method*" OR "participatory approach*" OR "participatory design*" OR "participatory model*" OR "user led research" OR "peer led research" OR "child led research" OR "youth led research" OR "peer model*" OR "peer research*" OR "consumer led research" OR "action research" OR "social action" OR "youth inquir*" OR "co-produc*" OR coproduc* OR "co-research*" OR coresearch* OR "co-creation" OR cocreation OR "co-design*" OR codesign* OR "co-develop*" OR codevelop* OR "co-investigator*" OR coinvestigator* OR "citizen science" OR "citizen scientist*" OR ypar ) OR ( ( youth OR young OR patient ) W/2 ( "advisory group*" OR "advisory council*" ) ) OR ( youth W/2 ( involvement OR participation ) ) OR ( research W/2 partner* ) ) ) AND ( LIMIT-TO ( PUBYEAR , 2021 ) OR LIMIT-TO ( PUBYEAR , 2020 ) OR LIMIT-TO ( PUBYEAR , 2019 ) OR LIMIT-TO ( PUBYEAR , 2018 ) OR LIMIT-TO ( PUBYEAR , 2017 ) OR LIMIT-TO ( PUBYEAR , 2016 ) OR LIMIT-TO ( PUBYEAR , 2015 ) OR LIMIT-TO ( PUBYEAR , 2014 ) OR LIMIT-TO ( PUBYEAR , 2013 ) OR LIMIT-TO ( PUBYEAR , 2012 ) OR LIMIT-TO ( PUBYEAR , 2011 ) OR LIMIT-TO ( PUBYEAR , 2010 ) OR LIMIT-TO ( PUBYEAR , 2009 ) OR LIMIT-TO ( PUBYEAR , 2008 ) OR LIMIT-TO ( PUBYEAR , 2007 ) OR LIMIT-TO ( PUBYEAR , 2006 ) OR LIMIT-TO ( PUBYEAR , 2005 ) OR LIMIT-TO ( PUBYEAR , 2004 ) OR LIMIT-TO ( PUBYEAR , 2003 ) OR LIMIT-TO ( PUBYEAR , 2002 ) OR LIMIT-TO ( PUBYEAR , 2001 ) OR LIMIT-TO ( PUBYEAR , 2000 ) ) AND ( LIMIT-TO ( LANGUAGE , "English" ) ) |

## Social Care Online

| Query                                                                                                                                                                                                                                                                                                                                                                                                                                                                                                                                                                                                                                                                                                                                                                                                                                                                                                                                                                                                                                                                                                                                                                                                                                                                                                                                                                                                                                                                                                                                                                                                                                                                                                                                                                             |
|-----------------------------------------------------------------------------------------------------------------------------------------------------------------------------------------------------------------------------------------------------------------------------------------------------------------------------------------------------------------------------------------------------------------------------------------------------------------------------------------------------------------------------------------------------------------------------------------------------------------------------------------------------------------------------------------------------------------------------------------------------------------------------------------------------------------------------------------------------------------------------------------------------------------------------------------------------------------------------------------------------------------------------------------------------------------------------------------------------------------------------------------------------------------------------------------------------------------------------------------------------------------------------------------------------------------------------------------------------------------------------------------------------------------------------------------------------------------------------------------------------------------------------------------------------------------------------------------------------------------------------------------------------------------------------------------------------------------------------------------------------------------------------------|
| ( TITLE-ABS-KEY ( child OR children OR kid OR kids OR girl* OR boy* OR adolescen* OR teen* OR youth* OR "young adult*" OR "young person" OR "young people" OR "young women" OR "young men" ) ) AND ( TITLE-ABS-KEY ( ( "participatory research*" OR "participatory method*" OR "participatory approach*" OR "participatory design*" OR "participatory model*" OR "user led research" OR "peer led research" OR "child led research" OR "youth led research" OR "peer model*" OR "peer research*" OR "consumer led research" OR "action research" OR "social action" OR "youth inquir*" OR "co-produc*" OR coproduc* OR "co-research*" OR coresearch* OR "co-creation" OR cocreation OR "co-design*" OR codesign* OR "co-develop*" OR codevelop* OR "co-investigator*" OR coinvestigator* OR "citizen science" OR "citizen scientist*" OR ypar ) OR ( ( youth OR young OR patient ) W/2 ( "advisory group*" OR "advisory council*" ) ) OR ( youth W/2 ( involvement OR participation ) ) OR ( research W/2 partner* ) ) ) AND ( LIMIT-TO ( PUBYEAR , 2021 ) OR LIMIT-TO ( PUBYEAR , 2020 ) OR LIMIT-TO ( PUBYEAR , 2019 ) OR LIMIT-TO ( PUBYEAR , 2018 ) OR LIMIT-TO ( PUBYEAR , 2017 ) OR LIMIT-TO ( PUBYEAR , 2016 ) OR LIMIT-TO ( PUBYEAR , 2015 ) OR LIMIT-TO ( PUBYEAR , 2014 ) OR LIMIT-TO ( PUBYEAR , 2013 ) OR LIMIT-TO ( PUBYEAR , 2012 ) OR LIMIT-TO ( PUBYEAR , 2011 ) OR LIMIT-TO ( PUBYEAR , 2010 ) OR LIMIT-TO ( PUBYEAR , 2009 ) OR LIMIT-TO ( PUBYEAR , 2008 ) OR LIMIT-TO ( PUBYEAR , 2007 ) OR LIMIT-TO ( PUBYEAR , 2006 ) OR LIMIT-TO ( PUBYEAR , 2005 ) OR LIMIT-TO ( PUBYEAR , 2004 ) OR LIMIT-TO ( PUBYEAR , 2003 ) OR LIMIT-TO ( PUBYEAR , 2002 ) OR LIMIT-TO ( PUBYEAR , 2001 ) OR LIMIT-TO ( PUBYEAR , 2000 ) ) AND ( LIMIT-TO ( LANGUAGE , "English" ) ) |
